# Supplementary material for: Square-planar imido complexes of cobalt: synthesis, reactivity and computational study
Source: Royal Society of Chemistry journal article supplement (doi:10.1039/d4dt01483a), 2024-01-01
Supplement: d4dt01483a1.pdf [file d4dt01483a1.pdf]

# Electronic Supplementary Information for

## Square-Planar Imido Complexes of Co: Synthesis, Reactivity and Computational Study

Jackson A. Reyna,<sup>a</sup> V. Mahesh Krishnan,<sup>a,b</sup> Roberto Silva Villatoro,<sup>a</sup> Hadi D. Arman,<sup>a</sup> Sebastian A. Stoian<sup>c,\*</sup> and Zachary J. Tonzetich<sup>a,\*</sup>

<sup>a</sup>Department of Chemistry, University of Texas at San Antonio (UTSA), San Antonio, TX 78249

<sup>b</sup>Present address: Eastman Chemical Company, 200 S. Wilcox Dr., Kingsport TN 37660.

<sup>c</sup>Department of Chemistry, University of Idaho, Moscow ID 83844.

\*[ssstoian@uidaho.edu](mailto:ssstoian@uidaho.edu) \*[zachary.tonzetich@utsa.edu](mailto:zachary.tonzetich@utsa.edu)

---

### Contents

|                                                                                                                                                                                                                                                                                                                                                                                                                          |    |
|--------------------------------------------------------------------------------------------------------------------------------------------------------------------------------------------------------------------------------------------------------------------------------------------------------------------------------------------------------------------------------------------------------------------------|----|
| S1. NMR Spectroscopy .....                                                                                                                                                                                                                                                                                                                                                                                               | 5  |
| <b>Figure S1.</b> <sup>1</sup> H NMR spectrum of <b>2a</b> , [Co(NMes)( <sup>t</sup> BuPNP)], in benzene- <i>d</i> <sub>6</sub> (s). Asterisk denotes small quantity of pentane used in crystallization. ....                                                                                                                                                                                                            | 5  |
| <b>Figure S2.</b> <sup>1</sup> H NMR spectrum of <b>2b</b> , [Co(NPh)( <sup>t</sup> BuPNP)], in benzene- <i>d</i> <sub>6</sub> (s). Asterisk denotes small quantity of pentane used in crystallization. ....                                                                                                                                                                                                             | 6  |
| <b>Figure S3.</b> <sup>1</sup> H NMR spectrum of <b>3</b> , [Co(N <sub>4</sub> Ph <sub>2</sub> )( <sup>t</sup> BuPNP)], in benzene- <i>d</i> <sub>6</sub> (s). Asterisk denotes small quantity of pentane used in crystallization. ....                                                                                                                                                                                  | 7  |
| <b>Figure S4.</b> <sup>1</sup> H NMR spectrum of <b>4a</b> , [Co(NHMes)( <sup>t</sup> BuPNP)], in benzene- <i>d</i> <sub>6</sub> (s). Asterisk denotes small quantity of pentane used in crystallization. ....                                                                                                                                                                                                           | 8  |
| <b>Figure S5.</b> <sup>1</sup> H NMR spectrum of <b>4b</b> , [Co(NHPh)( <sup>t</sup> BuPNP)], in benzene- <i>d</i> <sub>6</sub> (s). Asterisk denotes small quantity of pentane used in crystallization. ....                                                                                                                                                                                                            | 9  |
| <b>Figure S6.</b> <sup>1</sup> H NMR spectrum resulting from the addition of excess PhN <sub>3</sub> to <b>1</b> in benzene- <i>d</i> <sub>6</sub> showing successive formation of <b>2b</b> followed by <b>3</b> after 60 minutes. ....                                                                                                                                                                                 | 10 |
| S2. Cyclic voltammetry.....                                                                                                                                                                                                                                                                                                                                                                                              | 11 |
| <b>Figure S7.</b> Cyclic voltammogram of <b>2a</b> at a Pt disk electrode in THF. Scan rate is 50 mV/s and the supporting electrolyte is 0.2 M Bu <sub>4</sub> NPF <sub>6</sub> . ....                                                                                                                                                                                                                                   | 11 |
| S3. X-ray crystallography.....                                                                                                                                                                                                                                                                                                                                                                                           | 12 |
| <b>Figure S8.</b> Thermal ellipsoid drawing (50%) of the solid-state structure of <b>2b</b> . Hydrogen atoms and minor components of the disorder omitted for clarity. Selected bond distances (Å) and angles (deg): Co(1)-N(2) = 1.724(6); Co(1)-N(1) = 1.890(6); Co-P <sub>avg</sub> = 2.2454(13); N(2)-C(12) = 1.320(9); N(1)-Co(1)-N(2) = 171.5(3); P(1)-Co(1)-P(2) = 165.97(7); Co(1)-N(2)-C(12) = 155.24(10). .... | 12 |
| <b>Figure S9.</b> Thermal ellipsoid drawing (50%) of the solid-state structure of <b>4b</b> . Hydrogen atom with the exception of that bound to N(2) omitted for clarity. Selected bond distances (Å) and angles (deg): Co(1)-                                                                                                                                                                                           |    |

|                                                                                                                                                                                                                                                                                                                                                                                                                               |    |
|-------------------------------------------------------------------------------------------------------------------------------------------------------------------------------------------------------------------------------------------------------------------------------------------------------------------------------------------------------------------------------------------------------------------------------|----|
| N(2) = 1.880(2); Co(1)-N(1) = 1.875(2); Co(1)-P(1) = 2.3225(8); Co(1)-P(2) = 2.2300(8); N(2)-C(23) = 1.369(4); N(1)-Co(1)-N(2) = 172.96(11); P(1)-Co(1)-P(2) = 164.70(3); Co(1)-N(2)-C(23) = 133.0(2).....                                                                                                                                                                                                                    | 13 |
| <b>Table S1.</b> Crystallographic data and refinement parameters for <b>2a</b> , <b>2b</b> , <b>3</b> , <b>4a</b> , and <b>4b</b> . <sup>†</sup> .....                                                                                                                                                                                                                                                                        | 14 |
| S4. Computational studies .....                                                                                                                                                                                                                                                                                                                                                                                               | 15 |
| <b>Scheme S1.</b> Labels used for computational results tables. Thus, shown in blue is the <sup>t</sup> BuPNP ligand and in red the co-ligand. Pyr indicates the pyrrole core of <sup>t</sup> BuPNP, C6 the benzenic core of L <sub>im</sub> /L <sub>am</sub> and N <sub>4</sub> the tetraazene moiety of the tetrazido complex. ....                                                                                         | 15 |
| <b>Table S2.</b> DFT-predicted relative energies obtained for unbridged structural models derived from the experimental X-ray structures of <b>2a</b> , <b>2b</b> , <b>4b</b> and <b>3</b> .....                                                                                                                                                                                                                              | 16 |
| <b>Table S3.</b> Ligand and metal charges, see Scheme S2, inferred from the analysis of the Mulliken atomic charges and spins predicted using DFT for the imido complex <b>2a</b> and <b>2b</b> using an unbridged structural model derived from experimental X-ray structure. ....                                                                                                                                           | 17 |
| <b>Table S4.</b> Ligand and metal charges, see Scheme S2, inferred from the analysis of the Löwdin atomic charges and spins predicted using DFT for the imido complex <b>2a</b> using an unbridged structural model derived from experimental X-ray structure. ....                                                                                                                                                           | 17 |
| <b>Table S5.</b> Ligand and metal charges, see Scheme S2, inferred from the analysis of the natural atomic charges and spins predicted using DFT for the imido complex <b>2a</b> using an unbridged structural model derived from experimental X-ray structure. ....                                                                                                                                                          | 17 |
| <b>Figure S10.</b> Spin densities plots obtained for <b>2a</b> ( <i>left</i> ) and <b>2b</b> ( <i>right</i> ) for the F, S = 1 states ( <i>bottom</i> ) and the BS, S = 0 ( <i>top</i> ) at the B3LYP/def2-TZVPP level of theory. Plots were obtained using an isosurface value of ±0.008. α spin density is shown in purple and β spin density is shown in cyan.....                                                         | 18 |
| <b>Figure S11.</b> Spin-up, α ( <i>left</i> ) and spin-down, β ( <i>right</i> ) HOMO and LUMO molecular orbitals obtained for the BS, S = 0 state of <b>2a</b> at the BP86/def2-TZVPP level of theory. The corresponding spin density is shown in the top right corner of Figure S11.....                                                                                                                                     | 18 |
| <b>Table S6.</b> DFT-predicted reduced Mulliken orbital charges and spins for the cobalt ion of <b>2a</b> using an unbridged structural model derived from the experimental X-ray structure. ....                                                                                                                                                                                                                             | 18 |
| <b>Table S7.</b> DFT-predicted reduced Lowdin orbital charges and spins for the cobalt ion of <b>2a</b> using an unbridged structural model derived from the experimental X-ray structure. ....                                                                                                                                                                                                                               | 19 |
| <b>Table S8.</b> DFT-predicted natural atomic orbital occupancies for the cobalt site and nitrogen atom of the imido ligand of <b>2a</b> using an unbridged structural model derived from the experimental X-ray structure. ....                                                                                                                                                                                              | 19 |
| <b>Table S9.</b> DFT-predicted natural atomic orbital spins for the cobalt site of <b>2a</b> using an unbridged structural model derived from the experimental X-ray structure. ....                                                                                                                                                                                                                                          | 19 |
| <b>Table S10.</b> DFT-predicted Löwdin bond orders for the metal ligand-bonds of <b>2a</b> .....                                                                                                                                                                                                                                                                                                                              | 20 |
| <b>Figure S12.</b> Dominant electronic configuration, that contributes 64.7%, of the ground state predicted by the CAS(8,12) calculations performed for a simplified structural model of <b>2a</b> . These calculations considered 25 triplet, S = 1 states and 30 singlet, S = 0 states. The numbers shown in parentheses indicate the predicted Löwdin orbital populations of the corresponding active space orbitals. .... | 20 |
| <b>Table S11.</b> Spin and charge distributions inferred from the Mulliken population analysis of the CAS(8,12) calculations performed for a simplified structural model of <b>2a</b> . The “GS S” entry below indicates the spin of the ground state (root 0). ....                                                                                                                                                          | 20 |

|                                                                                                                                                                                                                                                                                                                                                                                                                                                                                                                                                                                                                                                                                                                                                                                                                             |    |
|-----------------------------------------------------------------------------------------------------------------------------------------------------------------------------------------------------------------------------------------------------------------------------------------------------------------------------------------------------------------------------------------------------------------------------------------------------------------------------------------------------------------------------------------------------------------------------------------------------------------------------------------------------------------------------------------------------------------------------------------------------------------------------------------------------------------------------|----|
| <b>Table S12.</b> Composition of the lowest triplet, $S = 1$ state predicted by the CAS(8,12) calculations of <b>2a</b> ...                                                                                                                                                                                                                                                                                                                                                                                                                                                                                                                                                                                                                                                                                                 | 21 |
| <b>Table S13.</b> Zero field splitting parameters and g tensors derived from the CAS(8,12) calculations of <b>2a</b> . Values obtained using the effective Hamiltonian approach implemented in ORCA.....                                                                                                                                                                                                                                                                                                                                                                                                                                                                                                                                                                                                                    | 21 |
| <b>Table S14.</b> Ligand and metal charges, see Scheme S2, inferred from the analysis of the Mulliken atomic charges and spins predicted using DFT for the amido complexes using unabridged structural models derived from experimental X-ray structures.....                                                                                                                                                                                                                                                                                                                                                                                                                                                                                                                                                               | 22 |
| <b>Table S15.</b> Ligand and metal charges, see Scheme S2, inferred from the analysis of the Löwdin atomic charges and spins predicted using DFT for the amido complexes using unabridged structural models derived from the experimental X-ray structures. ....                                                                                                                                                                                                                                                                                                                                                                                                                                                                                                                                                            | 22 |
| <b>Table S16.</b> Ligand and metal charges, see Scheme S2, derived from the natural population analysis using DFT predicted SCF density of the amido complexes using unabridged structural models derived from experimental X-ray structures. ....                                                                                                                                                                                                                                                                                                                                                                                                                                                                                                                                                                          | 23 |
| <b>Figure S13.</b> Plots of the predicted spin densities obtained for <b>4a</b> ( <i>left</i> ) and <b>4b</b> ( <i>middle</i> ) at the BP86/def2-TZVPP level of theory using unabridged structural models derived from the experimental structures. In addition, shown on the <i>right</i> is the CAS(7,11) predicted spin density obtained for a simplified structural model derived from the experimental structure of <b>4b</b> . These plots were obtained using an isosurface value of $\pm 0.008$ . Spin-up, $\alpha$ spin density is shown in purple and spin-down, $\beta$ spin density is shown in cyan. The axes, shown in black, and their labels indicate the orientation and principal values of the corresponding theoretical <b>g</b> tensors. Except for $H_{am}$ all other hydrogen atoms are omitted..... | 23 |
| <b>Table S17.</b> DFT-predicted reduced Mulliken orbital charges and spins for the cobalt ion the amido complex using an unabridged structural model derived from the experimental X-ray structure.....                                                                                                                                                                                                                                                                                                                                                                                                                                                                                                                                                                                                                     | 24 |
| <b>Table S18.</b> DFT-predicted reduced Löwdin orbital charges and spins obtained for the cobalt ions of the amido complexes using unabridged structural models derived from the experimental X-ray structures. .                                                                                                                                                                                                                                                                                                                                                                                                                                                                                                                                                                                                           | 24 |
| <b>Table S19.</b> DFT-predicted natural atomic orbital occupancies obtained for the cobalt site of the amido complex <b>4b</b> obtained for an unabridged structural model derived from the experimental X-ray structure. ....                                                                                                                                                                                                                                                                                                                                                                                                                                                                                                                                                                                              | 24 |
| <b>Table S20.</b> DFT-predicted natural atomic orbital spins obtained for the cobalt site of the amido complex <b>4b</b> using an unabridged structural model derived from the experimental X-ray structure.....                                                                                                                                                                                                                                                                                                                                                                                                                                                                                                                                                                                                            | 25 |
| <b>Table S21.</b> Analysis of the time-dependent (TD) DFT calculations performed for <b>4b</b> using an unabridged structural model derived from the experimental X-ray structure. ....                                                                                                                                                                                                                                                                                                                                                                                                                                                                                                                                                                                                                                     | 25 |
| <b>Figure S14.</b> Ligand field splitting diagram inferred for <b>4b</b> from the analysis of the one electron excitations predicted by TD DFT at the BP86/def2-TZVPP level of theory. Except for $H_{am}$ all other hydrogen atoms are omitted. ....                                                                                                                                                                                                                                                                                                                                                                                                                                                                                                                                                                       | 26 |
| <b>Figure S15.</b> The dominant electronic configuration which contributes 92.5% to the ground state predicted by the CAS(7,11) calculations performed for a simplified structural model of <b>4b</b> . These calculations considered 25 doublet, $S = 1/2$ states. The numbers shown in parentheses indicate the predicted Löwdin orbital populations of the corresponding active space orbitals. Except for $H_{am}$ all other hydrogen atoms are omitted. ....                                                                                                                                                                                                                                                                                                                                                           | 26 |
| <b>Table S22.</b> Theoretical <b>g</b> and <b>A</b> tensors obtained for the amido complexes. ....                                                                                                                                                                                                                                                                                                                                                                                                                                                                                                                                                                                                                                                                                                                          | 27 |
| <b>Figure S16.</b> SOMO ( <i>left</i> ) and spin density ( <i>right</i> ) of the monoanionic tetrazene ligand. When enforcing a $C_{2v}$ point group symmetry for the $[N_4]$ moiety the SOMO has a $b_1$ symmetry.....                                                                                                                                                                                                                                                                                                                                                                                                                                                                                                                                                                                                     | 27 |

|                                                                                                                                                                                                                                                                                                                                                                                                                                               |    |
|-----------------------------------------------------------------------------------------------------------------------------------------------------------------------------------------------------------------------------------------------------------------------------------------------------------------------------------------------------------------------------------------------------------------------------------------------|----|
| <b>Figure S17.</b> Spin densities plots obtained for <b>3</b> for the F, S = 1 states ( <i>left</i> ) and the BS, S = 0 ( <i>right</i> ) obtained TPSSH/def2-TZVPP ( <i>left</i> ) level of theory. These plots were obtained using an isosurface value of $\pm 0.008$ . Spin-up, $\alpha$ spin density is shown in purple and spin-down, $\beta$ spin density is shown in cyan.....                                                          | 27 |
| <b>Table S23.</b> Ligand and metal charges, see Scheme S2, inferred from the analysis of the Mulliken atomic charges and spins predicted using DFT for the tetrazido complex <b>3</b> using an unbridged structural model derived from experimental X-ray structure. ....                                                                                                                                                                     | 28 |
| <b>Table S24.</b> Ligand and metal charges, see Scheme S2, inferred from the analysis of the Löwdin atomic charges and spins predicted using DFT for the tetrazido complex <b>3</b> using an unbridged structural model derived from experimental X-ray structure. ....                                                                                                                                                                       | 28 |
| <b>Table S25.</b> Ligand and metal charges, see Scheme S2, inferred from the analysis of the natural atomic charges and spins predicted using DFT for the tetrazido complex <b>3</b> using an unbridged structural model derived from experimental X-ray structure. ....                                                                                                                                                                      | 29 |
| <b>Table S26.</b> DFT-predicted reduced Mulliken orbital charges and spins for the cobalt ion the tetrazido complex <b>3</b> using an unbridged structural model derived from the experimental X-ray structure. ....                                                                                                                                                                                                                          | 29 |
| <b>Table S27.</b> DFT-predicted reduced Löwdin orbital charges and spins for the cobalt ion the tetrazido complex <b>3</b> using an unbridged structural model derived from the experimental X-ray structure. ....                                                                                                                                                                                                                            | 29 |
| <b>Table S28.</b> DFT-predicted natural atomic orbital occupancies obtained for the cobalt site of the tetrazido complex <b>3</b> obtained for an unbridged structural model derived from the experimental X-ray structure. ....                                                                                                                                                                                                              | 30 |
| <b>Table S29.</b> DFT-predicted natural atomic orbital occupancies obtained for the cobalt site of the tetrazido complex <b>3</b> obtained for an unbridged structural model derived from the experimental X-ray structure. ....                                                                                                                                                                                                              | 30 |
| <b>Figure S18.</b> Active space orbitals and predicted spin density ( <i>right</i> ) obtained for the CAS(7,10) calculation of the tetrazene complex <b>3</b> which considered 10 S = 1, 25 S = 0 and 10 S = 2 states. The numbers shown in parentheses indicate the predicted Löwdin orbital populations of the corresponding active space orbitals. The major configurations contributing to the ground state are listed in Table S27. .... | 31 |
| <b>Table 30.</b> The twenty most important contributions to the triplet ground state of <b>3</b> predicted by various CAS(7,10) calculations using an unbridged structural model derived from the experimental structure. The orbitals spanning the active space are presented in Figure S18. ....                                                                                                                                            | 31 |
| <b>Table S31.</b> CAS(7,10) charge and spin distributions predicted for <b>3</b> .....                                                                                                                                                                                                                                                                                                                                                        | 32 |
| <b>Table S32.</b> Zero field splitting parameters and g tensors derived from the CAS(7,10) calculations of <b>3</b> . Values obtained using the effective Hamiltonian approach implemented in ORCA.....                                                                                                                                                                                                                                       | 32 |
| S5. Reference .....                                                                                                                                                                                                                                                                                                                                                                                                                           | 32 |

# S1. NMR Spectroscopy

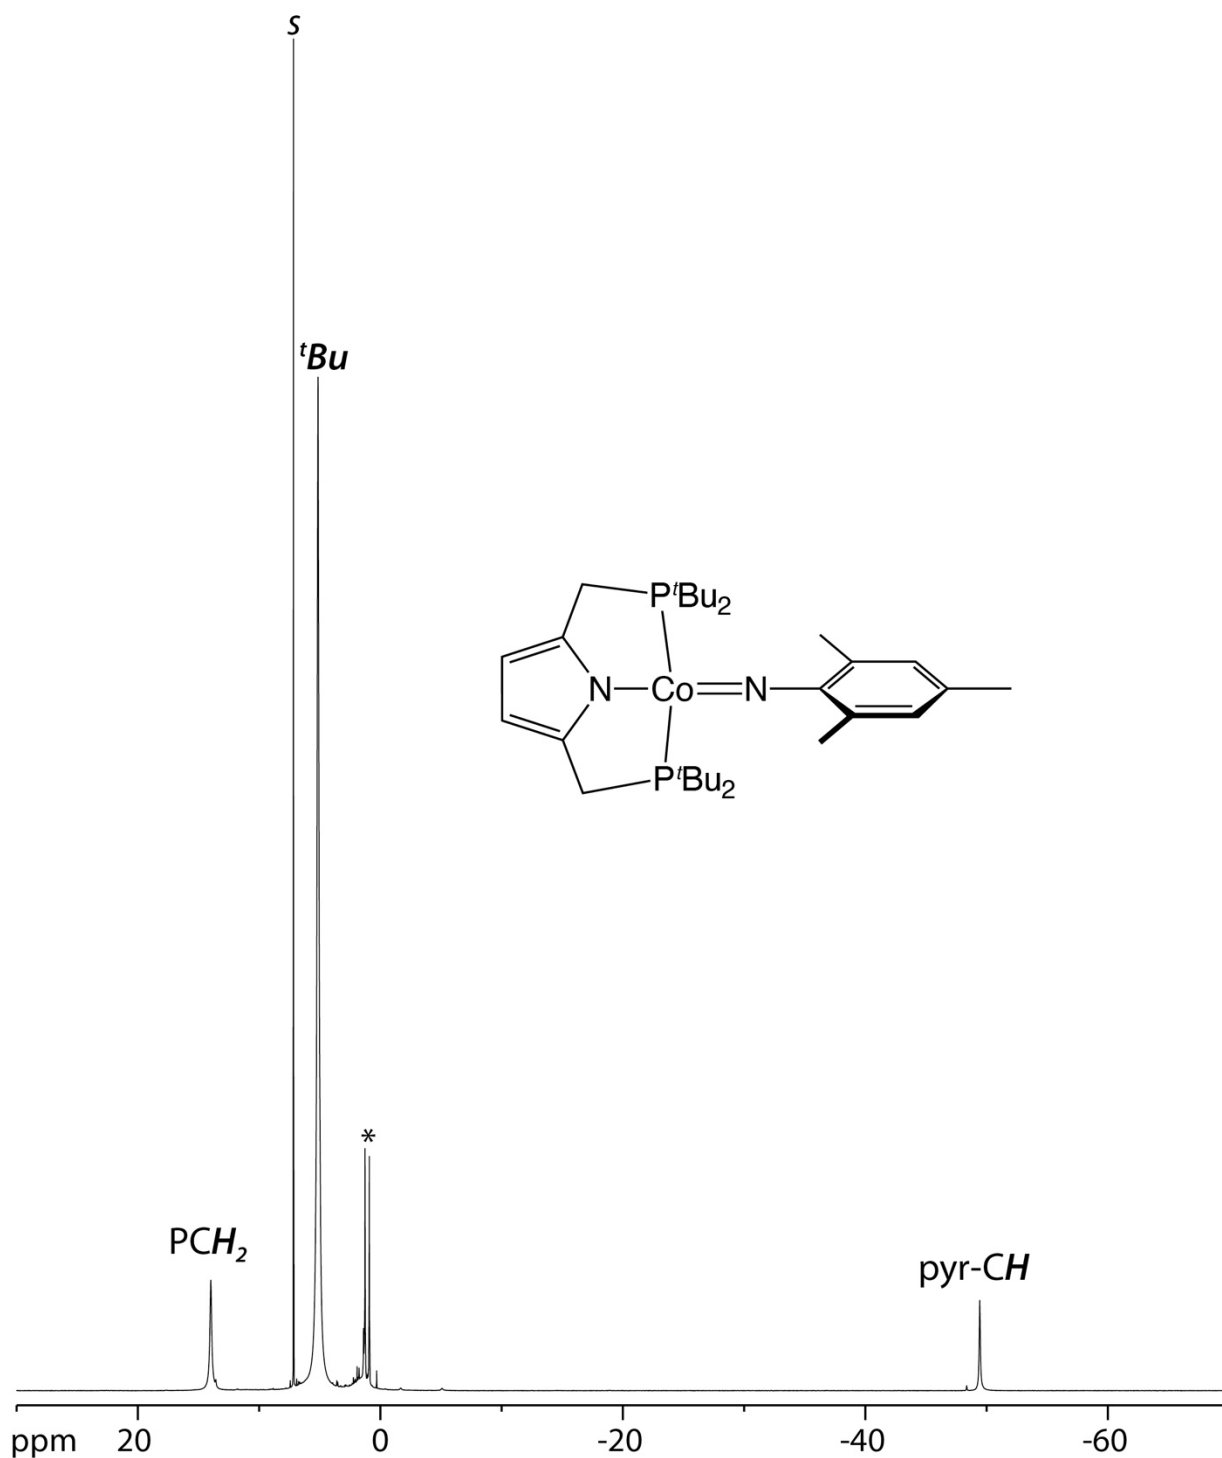

**Figure S1.**  $^1\text{H}$  NMR spectrum of **2a**,  $[\text{Co}(\text{NMe}_2)(^t\text{BuPNP})]$ , in benzene- $d_6$  (s). Asterisk denotes small quantity of pentane used in crystallization.

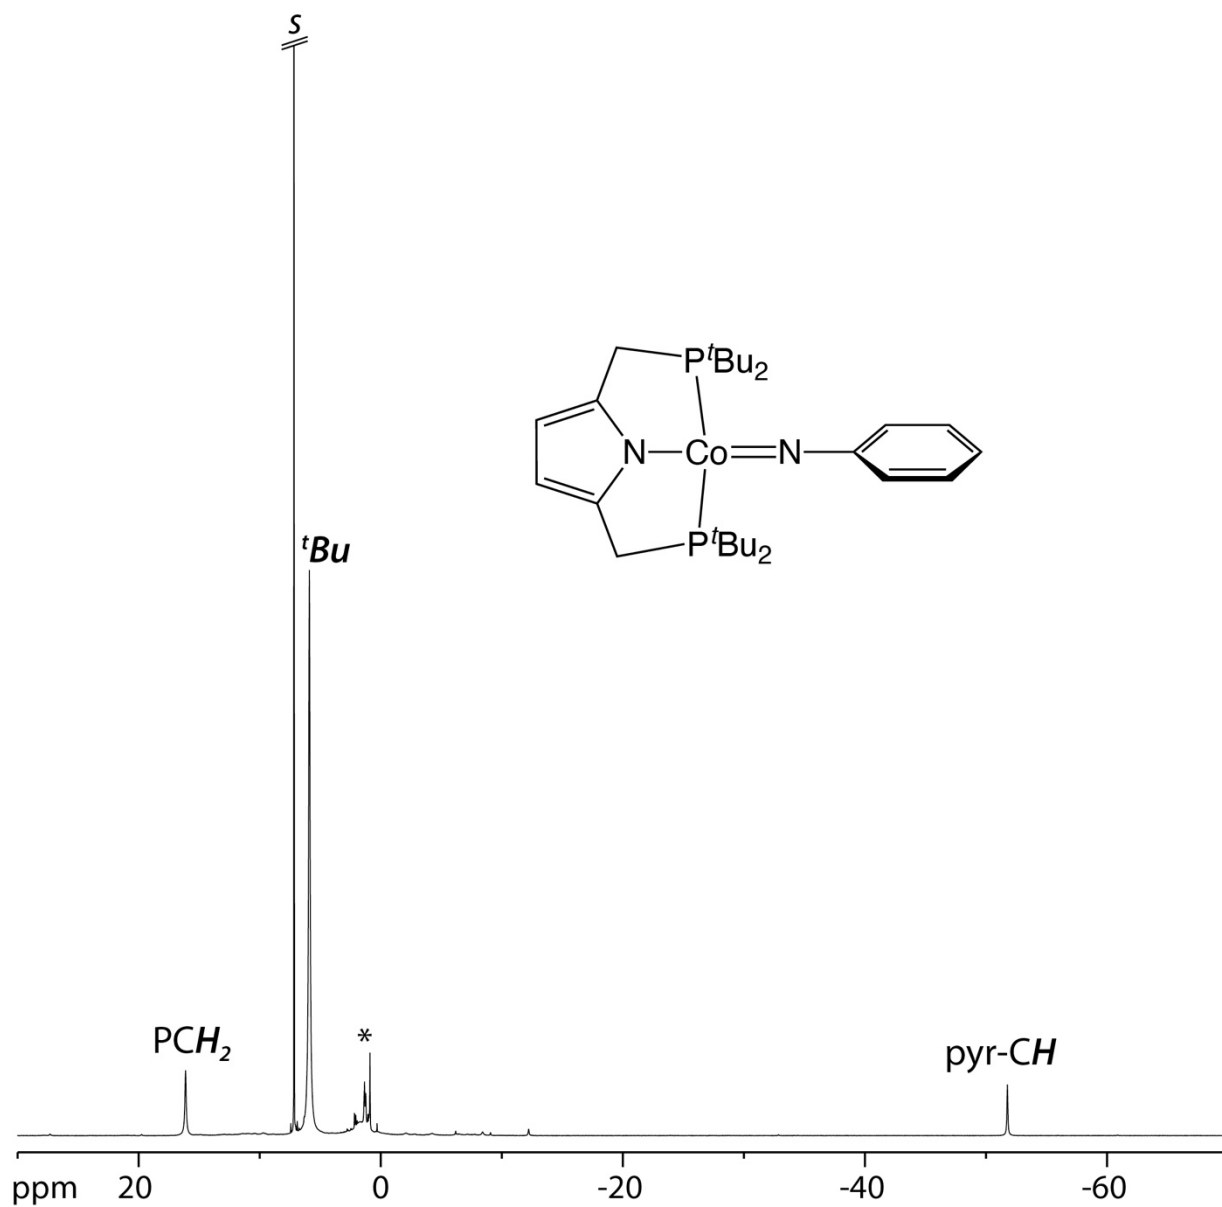

**Figure S2.**  $^1\text{H}$  NMR spectrum of **2b**,  $[\text{Co}(\text{NPh})(^t\text{BuPNP})]$ , in benzene- $d_6$  ( $s$ ). Asterisk denotes small quantity of pentane used in crystallization.

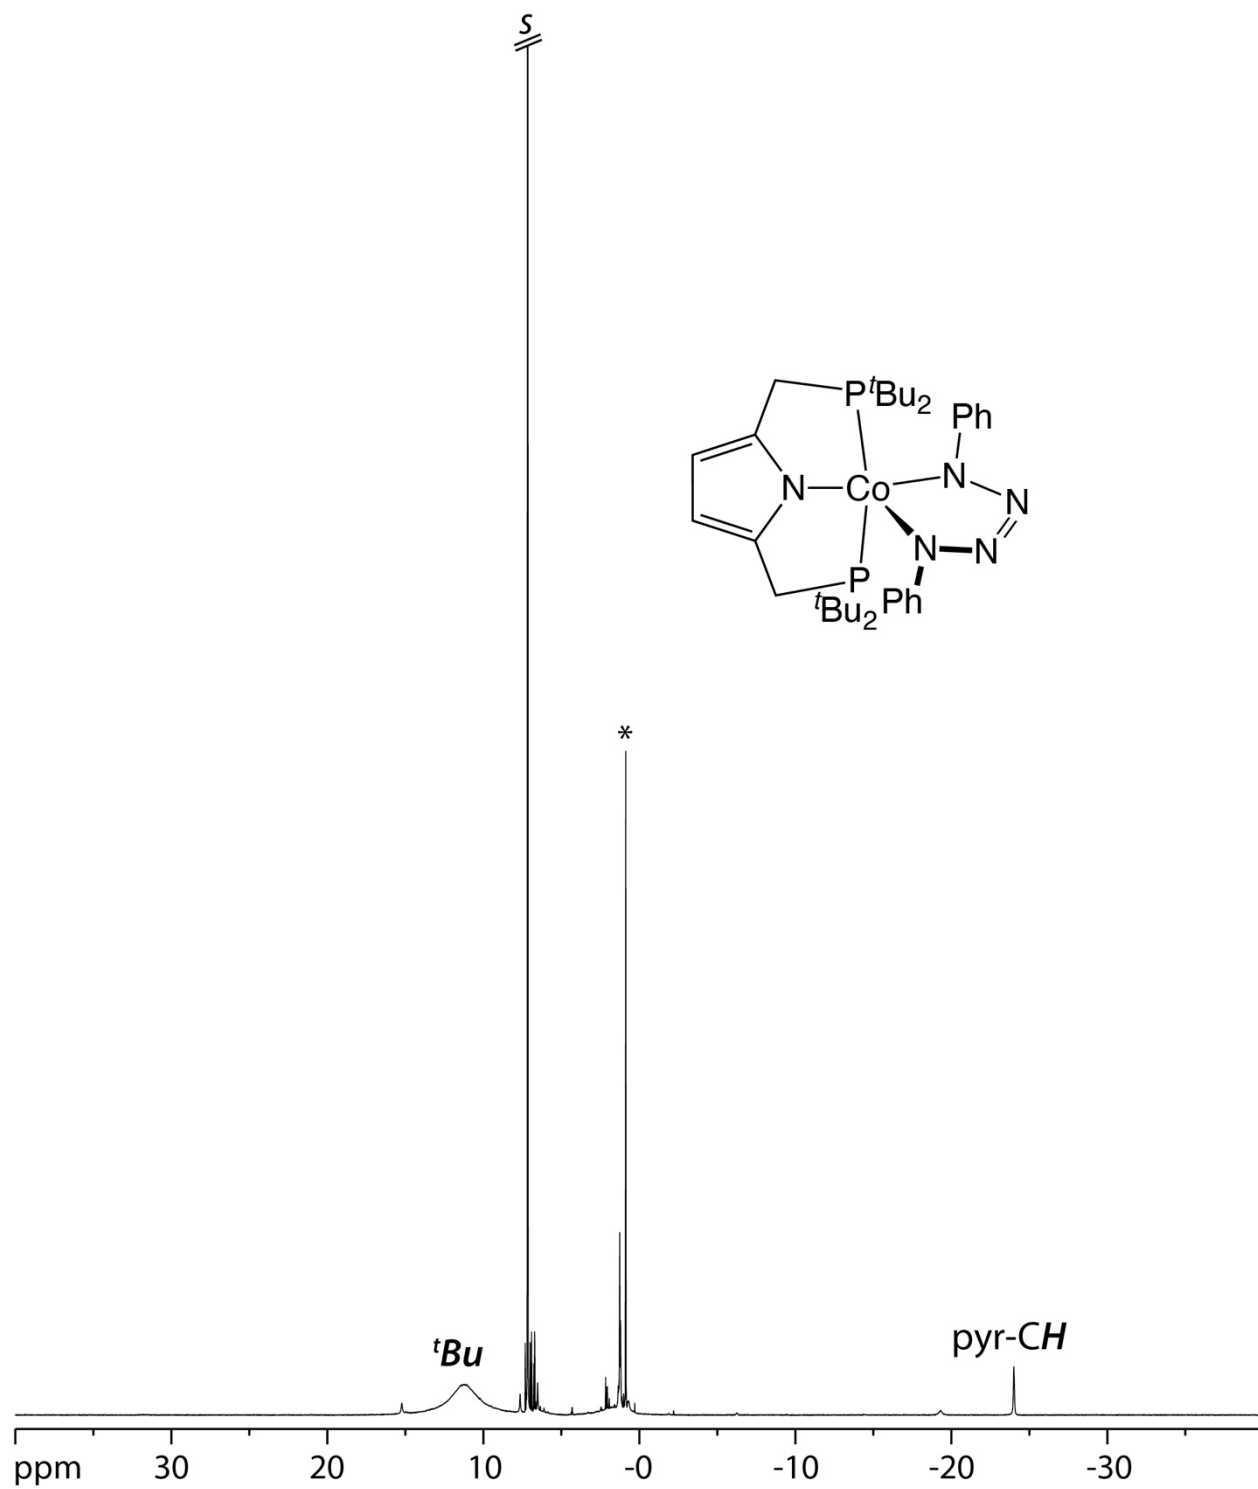

**Figure S3.**  $^1\text{H}$  NMR spectrum of **3**,  $[\text{Co}(\text{N}_4\text{Ph}_2)(^t\text{BuPNP})]$ , in benzene- $d_6$  (s). Asterisk denotes small quantity of pentane used in crystallization.

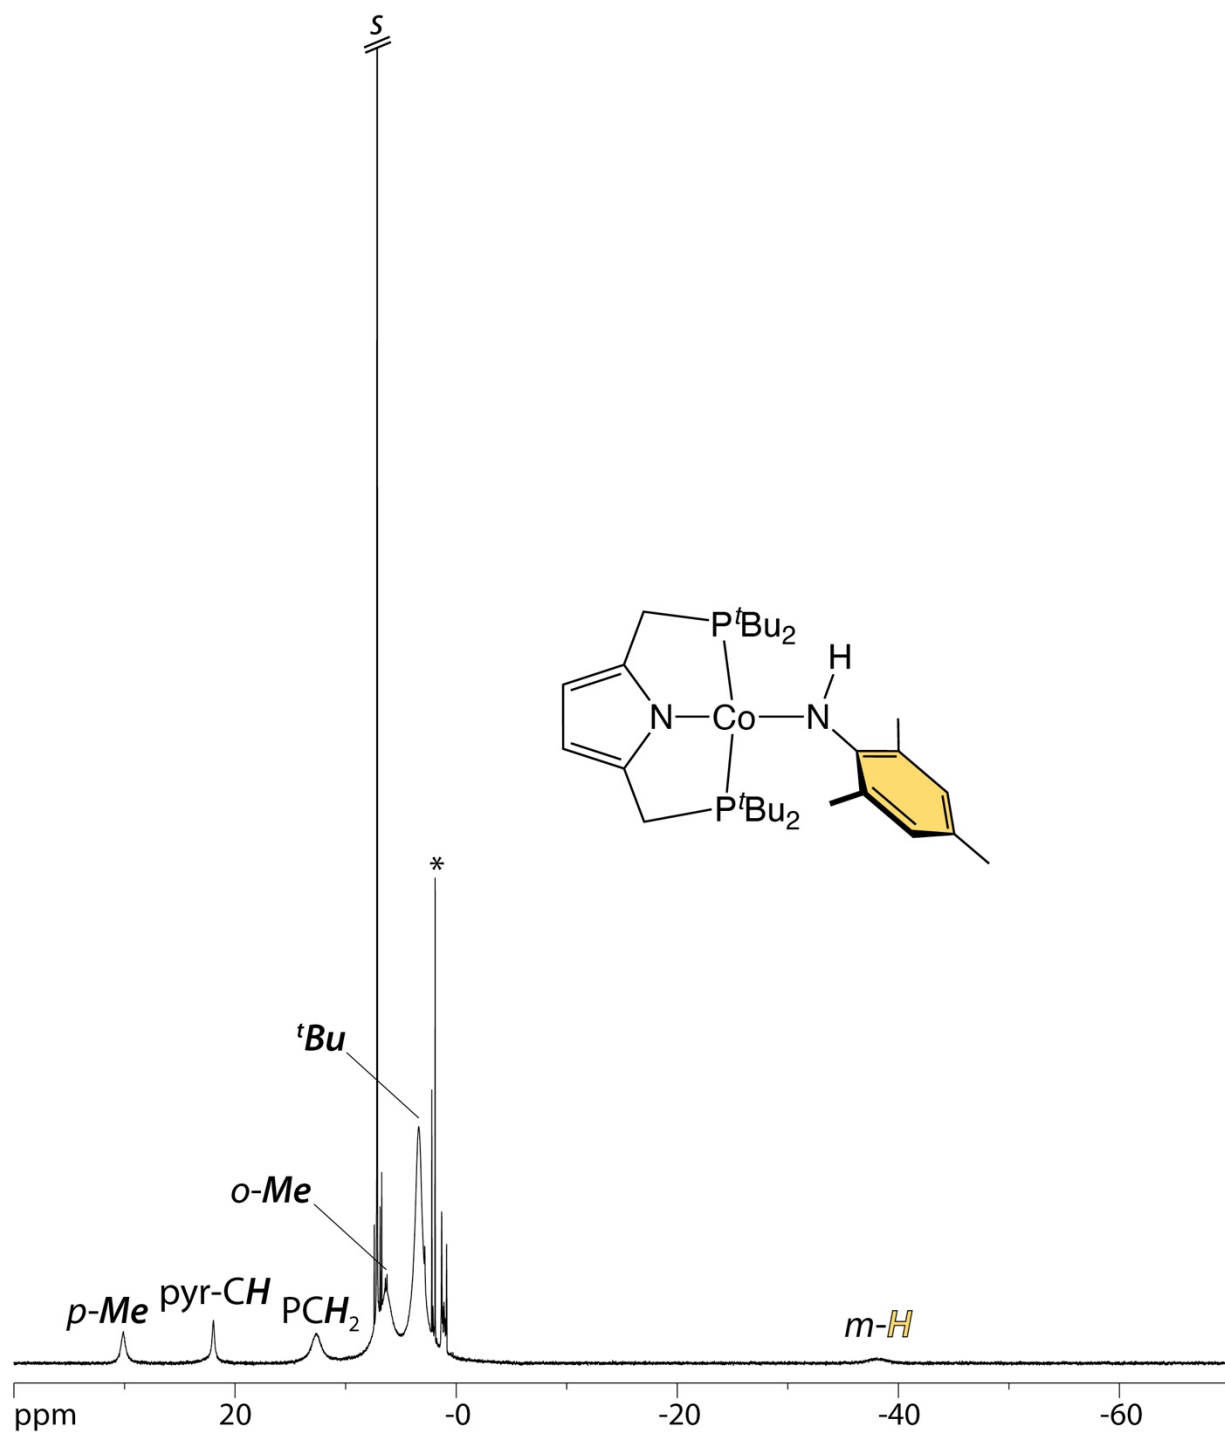

**Figure S4.** <sup>1</sup>H NMR spectrum of **4a**, [Co(NHMes)(<sup>t</sup>BuPNP)], in benzene-*d*<sub>6</sub> (s). Asterisk denotes small quantity of pentane used in crystallization.



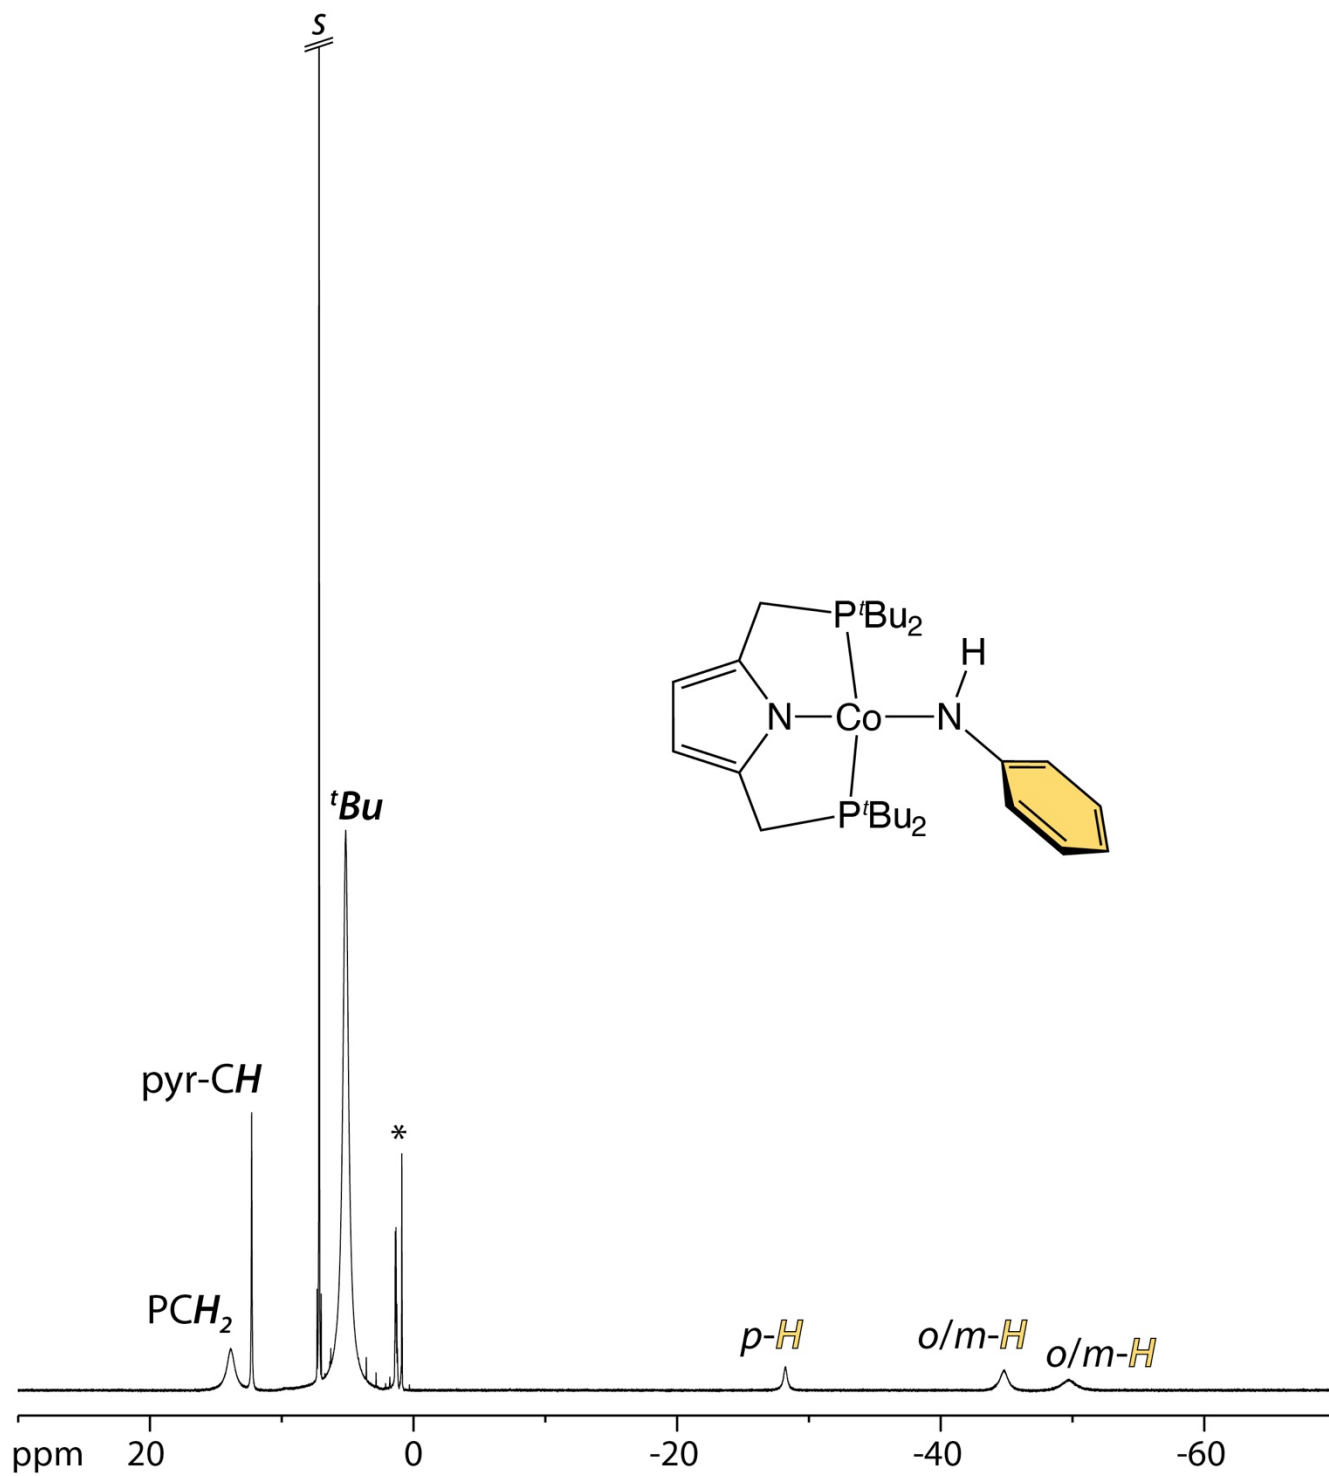

**Figure S5.**  $^1\text{H}$  NMR spectrum of **4b**,  $[\text{Co}(\text{NHPh})(^t\text{BuPNP})]$ , in benzene- $d_6$  (s). Asterisk denotes small quantity of pentane used in crystallization.

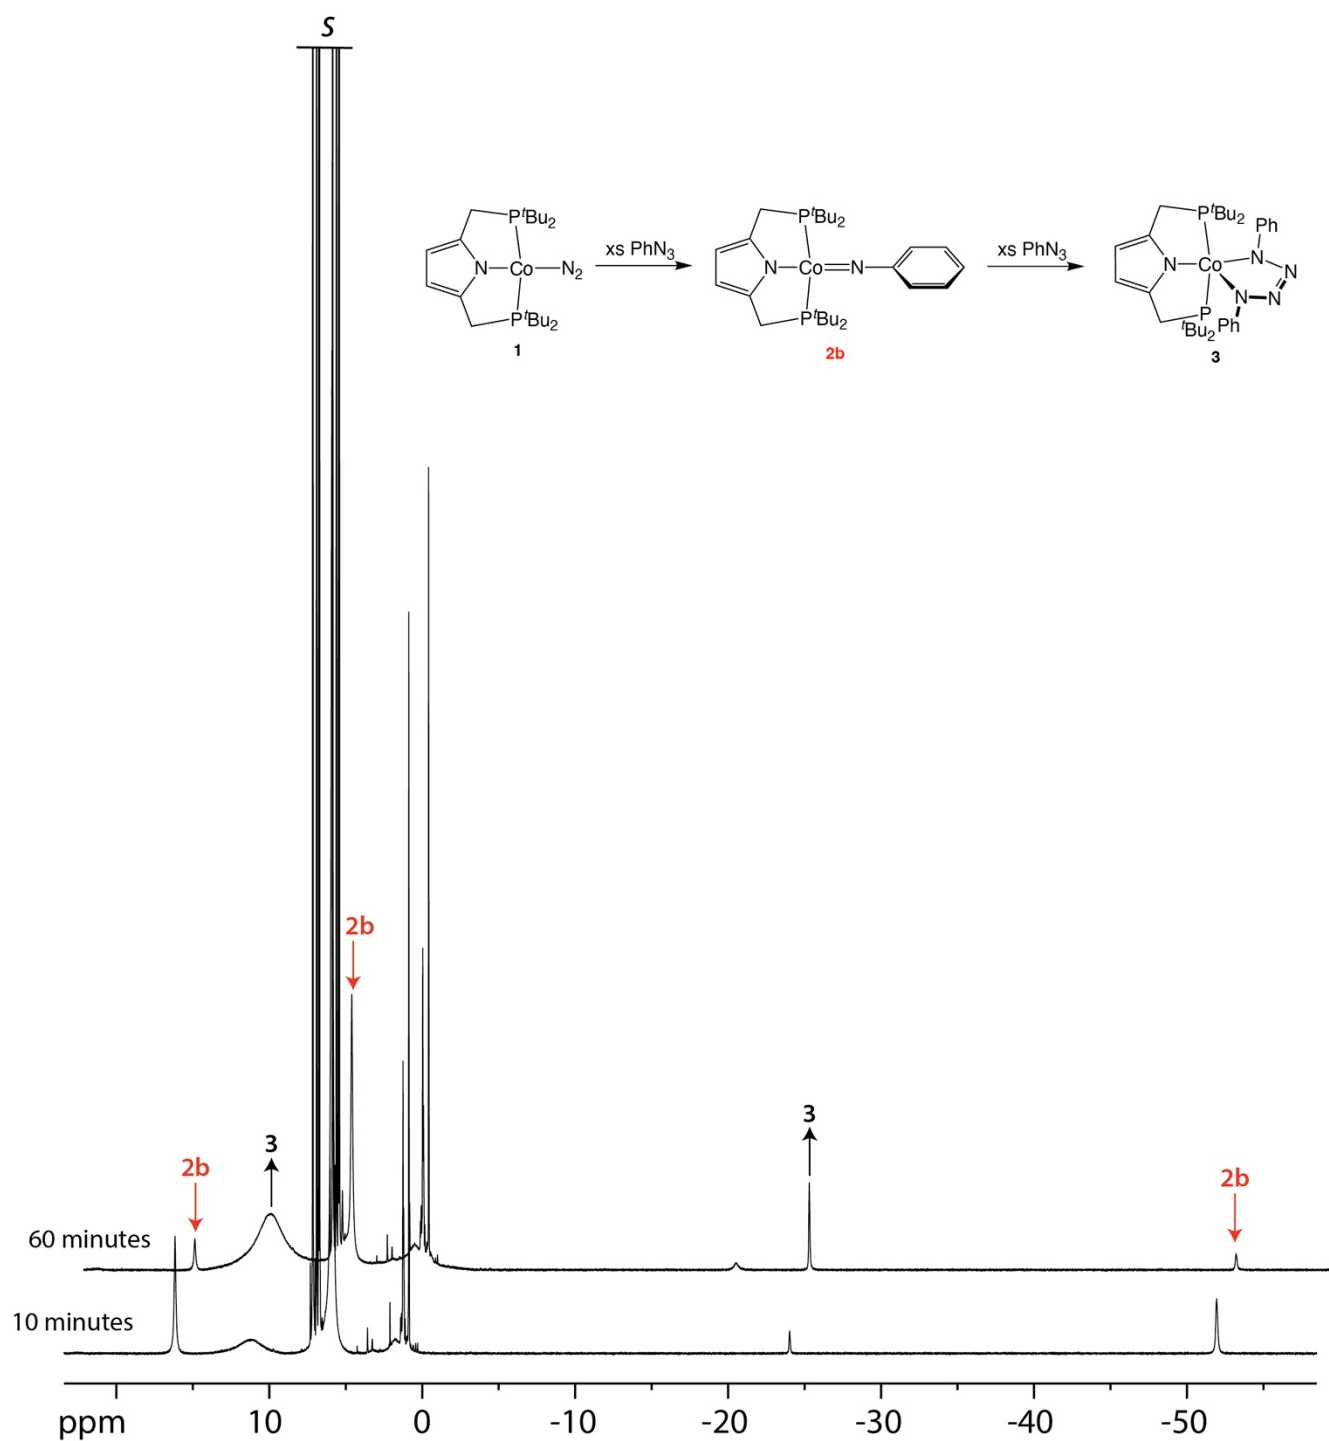

**Figure S6.**  $^1\text{H}$  NMR spectrum resulting from the addition of excess  $\text{PhN}_3$  to **1** in  $\text{benzene-}d_6$  showing successive formation of **2b** followed by **3** after 60 minutes.

## S2. Cyclic voltammetry

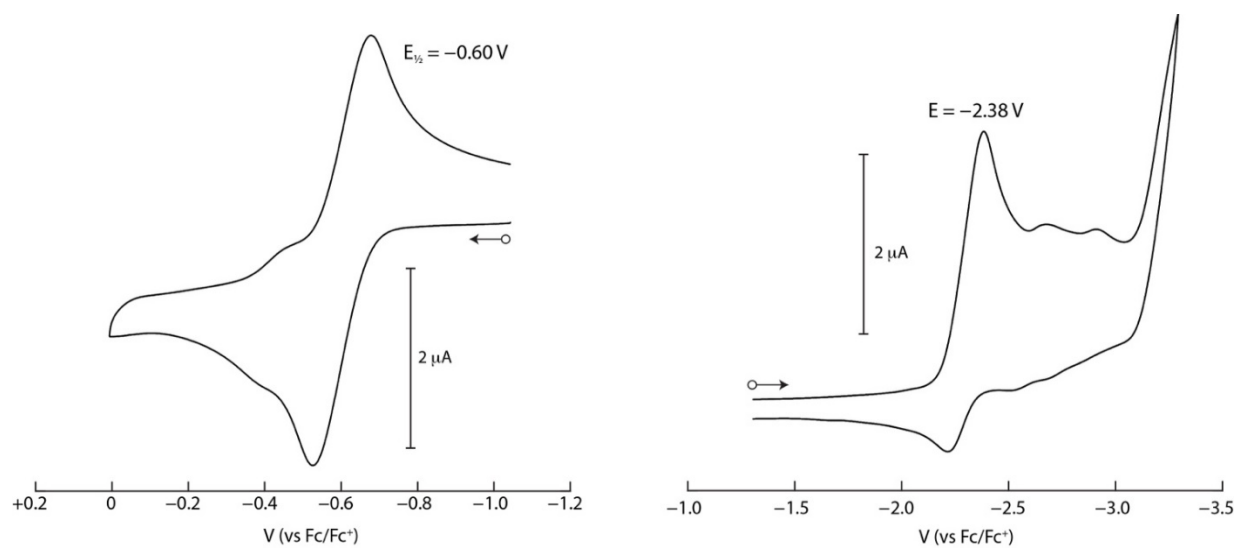

**Figure S7.** Cyclic voltammogram of **2a** at a Pt disk electrode in THF. Scan rate is 50 mV/s and the supporting electrolyte is 0.2 M Bu<sub>4</sub>NPF<sub>6</sub>.

### S3. X-ray crystallography

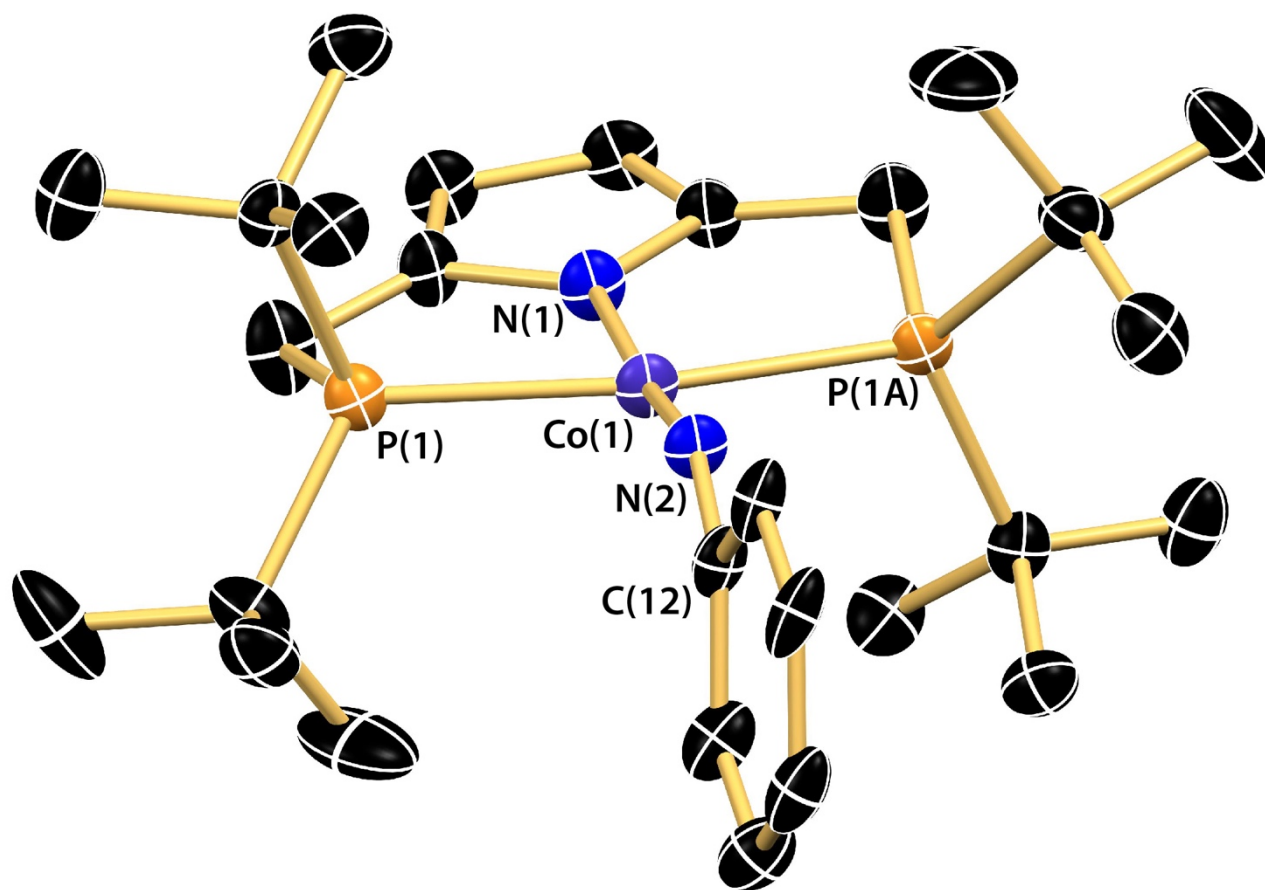

**Figure S8.** Thermal ellipsoid drawing (50%) of the solid-state structure of **2b**. Hydrogen atoms and minor components of the disorder omitted for clarity. Selected bond distances (Å) and angles (deg): Co(1)-N(2) = 1.724(6); Co(1)-N(1) = 1.890(6); Co-P<sub>avg</sub> = 2.2454(13); N(2)-C(12) = 1.320(9); N(1)-Co(1)-N(2) = 171.5(3); P(1)-Co(1)-P(2) = 165.97(7); Co(1)-N(2)-C(12) = 155.24(10).

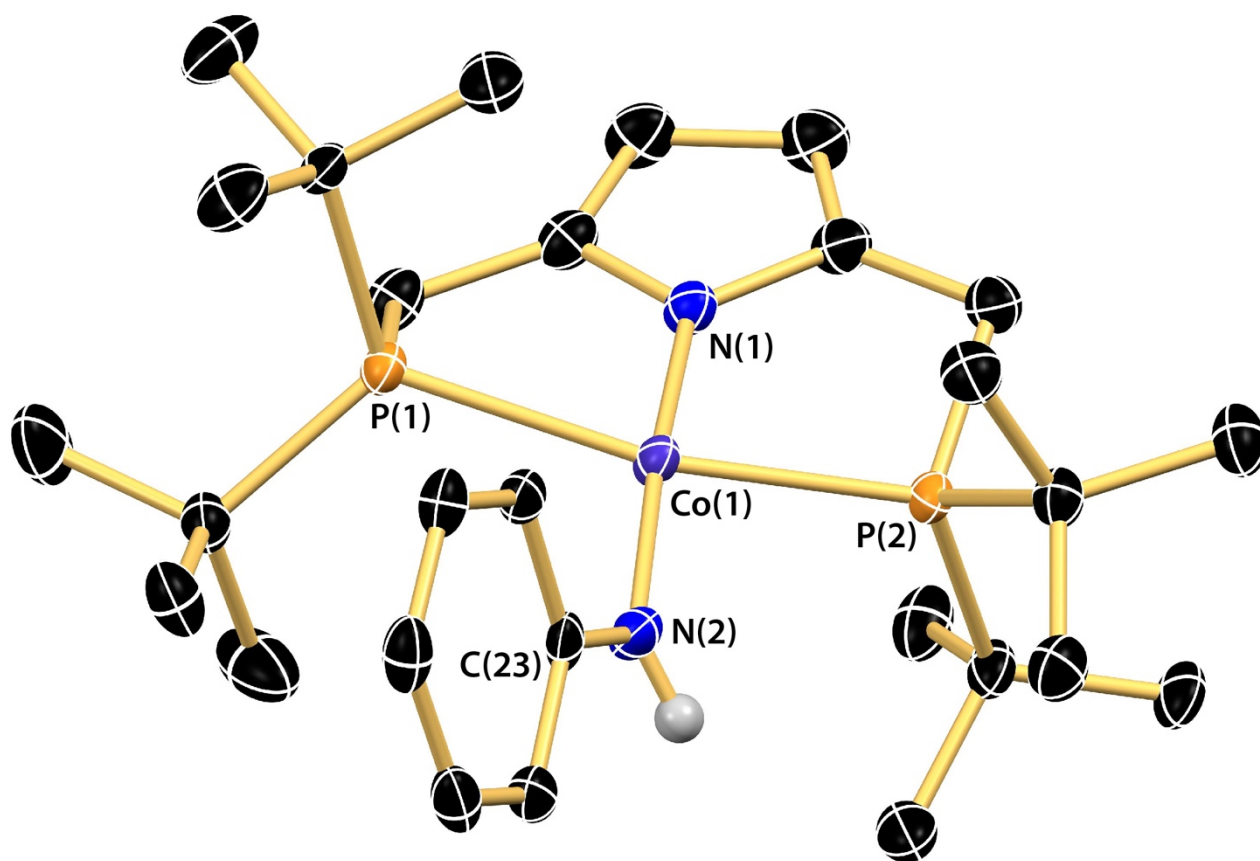

**Figure S9.** Thermal ellipsoid drawing (50%) of the solid-state structure of **4b**. Hydrogen atom with the exception of that bound to N(2) omitted for clarity. Selected bond distances (Å) and angles (deg): Co(1)-N(2) = 1.880(2); Co(1)-N(1) = 1.875(2); Co(1)-P(1) = 2.3225(8); Co(1)-P(2) = 2.2300(8); N(2)-C(23) = 1.369(4); N(1)-Co(1)-N(2) = 172.96(11); P(1)-Co(1)-P(2) = 164.70(3); Co(1)-N(2)-C(23) = 133.0(2).

**Table S1.** Crystallographic data and refinement parameters for **2a**, **2b**, **3**, **4a**, and **4b**.<sup>†</sup>

| Compound                                                 | <b>2a</b>                                                                                         | <b>2b</b>                                                                                          | <b>3·C<sub>6</sub>H<sub>6</sub></b>                                                               | <b>4a</b>                                                                                                                                       | <b>4b</b>                                                                                      |
|----------------------------------------------------------|---------------------------------------------------------------------------------------------------|----------------------------------------------------------------------------------------------------|---------------------------------------------------------------------------------------------------|-------------------------------------------------------------------------------------------------------------------------------------------------|------------------------------------------------------------------------------------------------|
| Formula                                                  | C <sub>31</sub> H <sub>53</sub> CoN <sub>2</sub> P <sub>2</sub>                                   | C <sub>28</sub> H <sub>47</sub> CoN <sub>2</sub> P <sub>2</sub>                                    | C <sub>40</sub> H <sub>58</sub> CoN <sub>5</sub> P <sub>2</sub>                                   | C <sub>31</sub> H <sub>54</sub> CoN <sub>2</sub> P <sub>2</sub>                                                                                 | C <sub>28</sub> H <sub>48</sub> CoN <sub>2</sub> P <sub>2</sub>                                |
| FW (g/mol)                                               | 574.62                                                                                            | 532.54                                                                                             | 729.78                                                                                            | 575.63                                                                                                                                          | 533.55                                                                                         |
| System,<br>space group                                   | monoclinic,<br><i>P</i> 2 <sub>1</sub> / <i>c</i>                                                 | monoclinic,<br><i>C</i> 2/ <i>c</i>                                                                | monoclinic,<br><i>P</i> 2 <sub>1</sub> / <i>c</i>                                                 | triclinic,<br><i>P</i> $\bar{1}$                                                                                                                | monoclinic,<br><i>P</i> 2 <sub>1</sub> / <i>n</i>                                              |
| Source                                                   | Cu K $\alpha$                                                                                     | Cu K $\alpha$                                                                                      | Cu K $\alpha$                                                                                     | Cu K $\alpha$                                                                                                                                   | Mo K $\alpha$                                                                                  |
| Temperature (K)                                          | 100.0(1)                                                                                          | 100.0(1)                                                                                           | 100.0(1)                                                                                          | 100.0(1)                                                                                                                                        | 98.0(1)                                                                                        |
| Unit Cell<br>Parameters<br>(Å, deg)                      | <i>a</i> = 10.46810(10)<br><i>b</i> = 15.3341(2)<br><i>c</i> = 19.6726(2)<br>$\beta$ = 102.577(1) | <i>a</i> = 15.8666(12)<br><i>b</i> = 13.3021(8)<br><i>c</i> = 14.6700(13)<br>$\beta$ = 112.540(10) | <i>a</i> = 19.1588(3)<br><i>b</i> = 9.92290(10)<br><i>c</i> = 20.4294(2)<br>$\beta$ = 93.9130(10) | <i>a</i> = 8.2605(2)<br><i>b</i> = 12.7200(2)<br><i>c</i> = 15.1520(3)<br>$\alpha$ = 82.9900(10)<br>$\beta$ = 87.941(2)<br>$\gamma$ = 78.642(2) | <i>a</i> = 10.4942(3)<br><i>b</i> = 13.3791(4)<br><i>c</i> = 20.8730(6)<br>$\beta$ = 99.876(3) |
| Volume (Å <sup>3</sup> )                                 | 3082.05(6)                                                                                        | 2859.7(4)                                                                                          | 3874.80(8)                                                                                        | 1549.11(6)                                                                                                                                      | 2887.20(15)                                                                                    |
| Z                                                        | 4                                                                                                 | 4                                                                                                  | 4                                                                                                 | 2                                                                                                                                               | 4                                                                                              |
| Calc. $\rho$ (g/cm <sup>3</sup> )                        | 1.238                                                                                             | 1.237                                                                                              | 1.251                                                                                             | 1.234                                                                                                                                           | 1.227                                                                                          |
| F(000)                                                   | 1240                                                                                              | 1144                                                                                               | 1560                                                                                              | 622                                                                                                                                             | 1148                                                                                           |
| Crystal (mm)                                             | 0.12×0.01×0.04                                                                                    | 0.12×0.06×0.04                                                                                     | 0.13×0.06×0.03                                                                                    | 0.16×0.05×0.05                                                                                                                                  | 0.37×0.17×0.13                                                                                 |
| $\Theta$ range (deg)                                     | 3.689 to 76.558                                                                                   | 4.482 to 72.422                                                                                    | 2.344 to 74.383                                                                                   | 2.939 to 77.957                                                                                                                                 | 1.816 to 26.500                                                                                |
| Limiting indices                                         | -13 ≤ <i>h</i> ≤ 12<br>-19 ≤ <i>k</i> ≤ 17<br>-23 ≤ <i>l</i> ≤ 24                                 | -18 ≤ <i>h</i> ≤ 19<br>-16 ≤ <i>k</i> ≤ 16<br>-17 ≤ <i>l</i> ≤ 17                                  | -23 ≤ <i>h</i> ≤ 24<br>-10 ≤ <i>k</i> ≤ 12<br>-25 ≤ <i>l</i> ≤ 24                                 | -10 ≤ <i>h</i> ≤ 7<br>-16 ≤ <i>k</i> ≤ 16<br>-19 ≤ <i>l</i> ≤ 18                                                                                | -13 ≤ <i>h</i> ≤ 13<br>-12 ≤ <i>k</i> ≤ 16<br>-26 ≤ <i>l</i> ≤ 26                              |
| Data / unique                                            | 35706 / 6280                                                                                      | 12532 / 2698                                                                                       | 44268 / 7672                                                                                      | 35236 / 6334                                                                                                                                    | 20631 / 5983                                                                                   |
| Completeness                                             | 96.8%                                                                                             | 99.0%                                                                                              | 94.3%                                                                                             | 95.5%                                                                                                                                           | 99.95%                                                                                         |
| Data / restraints<br>/ parameters                        | 6280 / 0 / 340                                                                                    | 2698 / 0 / 182                                                                                     | 7672 / 0 / 433                                                                                    | 6334 / 0 / 343                                                                                                                                  | 5983 / 0 / 313                                                                                 |
| Goodness-of-fit                                          | 1.036                                                                                             | 1.087                                                                                              | 1.086                                                                                             | 1.072                                                                                                                                           | 1.137                                                                                          |
| Final R indices<br>[ <i>I</i> > 2 $\sigma$ ( <i>I</i> )] | R <sub>1</sub> = 0.0322,<br>wR <sub>2</sub> = 0.0776                                              | R <sub>1</sub> = 0.0859,<br>wR <sub>2</sub> = 0.1546                                               | R <sub>1</sub> = 0.0435,<br>wR <sub>2</sub> = 0.0966                                              | R <sub>1</sub> = 0.0352,<br>wR <sub>2</sub> = 0.0887                                                                                            | R <sub>1</sub> = 0.536<br>wR <sub>2</sub> = 0.1107                                             |
| R indices<br>(all data)                                  | R <sub>1</sub> = 0.0343,<br>wR <sub>2</sub> = 0.0787                                              | R <sub>1</sub> = 0.0909,<br>wR <sub>2</sub> = 0.1566                                               | R <sub>1</sub> = 0.0498,<br>wR <sub>2</sub> = 0.0992                                              | R <sub>1</sub> = 0.0367,<br>wR <sub>2</sub> = 0.0894                                                                                            | R <sub>1</sub> = 0.0622,<br>wR <sub>2</sub> = 0.1157                                           |
| Residuals (e·Å <sup>-3</sup> )                           | 0.282 / -0.294                                                                                    | 0.772 / -0.540                                                                                     | 0.456 / -0.389                                                                                    | 0.529 / -0.489                                                                                                                                  | 0.557 / -0.361                                                                                 |

<sup>†</sup>Refinement method was full-matrix least-squares on  $F^2$ .  $R_1 = \sum ||F_o| - |F_c|| / \sum |F_o|$ ;  $wR_2 = (\sum [w(F_o^2 - F_c^2)^2] / \sum [w(F_o^2)^2])^{1/2}$ .

## S4. Computational studies

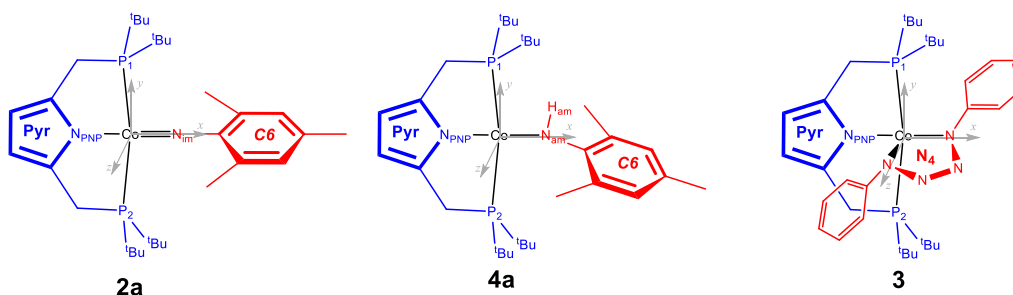

**Scheme S1.** Labels used for computational results tables. Thus, shown in blue is the  $t^{\text{Bu}}$ PNP ligand and in red the co-ligand. Pyr indicates the pyrrole core of  $t^{\text{Bu}}$ PNP, C6 the benzenic core of  $L_{\text{im}}/L_{\text{am}}$  and  $N_4$  the tetraazene moiety of the tetrazido complex.

**Computational Details.** DFT calculations used the BP86,<sup>1</sup> B3LYP<sup>2</sup> and TPSSH<sup>3</sup> functionals. While the runs involving the hybrid B3LYP and TPSSH functionals relied on the RIJCOSX approximation, the BP86 calculations used the Split-RI-J approximation. The structural models employed in this study were derived from the corresponding experimental X-ray structures. These structures were used both for stand-alone, single point calculations and as starting point for geometry optimizations. The ground state character of a predicted electronic configuration was assessed using time-dependent (TD) DFT calculation such that all predicted one electron excitations were found to have positive energies. For the cases where the SCF led to an excited state, the corresponding negative TD excitation energies were removed by performing a series of orbital swaps, using the *rotate* keyword of the *scf* block, followed by subsequent SCF and TD DFT calculations. The characters of the predicted electronic configurations was inferred by inspecting the results of the Mulliken, Löwdin and natural population analyses.<sup>4</sup> The later analysis was performed using the NBO 7 program.<sup>5</sup> Finally, theoretical zero-field splitting (ZFS) and g tensors were derived from coupled-perturbed (CP) calculations.<sup>6,7</sup>

*Ab initio* CASSCF calculations were performed using unabridged and simplified structural models derived from the experimental X-ray structures. The initial guesses were derived from restricted open shell, requested using the *roks* keyword, BP86/def2-TZVPP calculations. The active spaces of the initial CAS( $n,m$ ) runs, where  $n$  are the number of orbitals and  $m$  the number of electrons, were spanned by the molecular orbitals (MOs) with a contribution from the 3d cobalt orbitals larger than 10 %. These initial runs provided much purer MOs which allowed us to reduce the size of the active spaces of the subsequent calculations. The imido, **2a** complex was investigated using a series of CAS(8,12) calculations for which the active space was spanned by the bonding and antibonding  $\sigma$  orbitals with a  $3dx^2-y^2$  parentage, the non-bonding  $3dz^2$  and  $3dyz$  orbitals, and the bonding and antibonding sets of two  $\pi$ -orbitals resulted from the interaction of the cobalt based  $\{3dxy, 3dxz\}$  with the  $\{pz, py\}$  orbitals localized on the N atom of the imido ligand. In this case we used a simplified structural model obtained by replacing the four  $t^{\text{Bu}}$  groups of the PNP ligand with Me, and the methyl groups of the imido co-ligand with H atoms. The CASSCF calculations of the amido complex, **4a** also used a simplified model for which the  $t^{\text{Bu}}$  groups were replaced with Me. In this case, the CAS(7,11) active space was spanned by the  $\sigma/\sigma^*$  MOs involving the  $3dx^2-y^2$  cobalt orbital, the remaining 3d cobalt orbitals which are essentially non-bonding and a N p-type orbital orthogonal to the CNH plane of the amido co-ligand. Finally, for the tetrazaene complex **3** we used an unabridged structural model and an CAS(7,10) active space spanned five canonical 3d cobalt orbitals including the  $\sigma^*$  antibonding MO with a strong  $3dx^2-y^2$  character, the  $\sigma$ -bonding ligand based orbital derived from  $3dx^2-y^2$  and the SOMO orbital of the  $S = 1/2$  monoanionic tetrazaene.

For the case of the amido complexes (**4**), the magnetic anisotropy observed by EPR was investigated further using the TD-DFT predicted excited states to obtain theoretical estimates of the  $\tilde{g}$  and  $\tilde{A}$  tensors using coupled-perturbed (CP) DFT. The TD-DFT suggests that the lowest excited orbital state has an energy of ca. 5000  $\text{cm}^{-1}$  and is attained by promoting the spin-down,  $\beta$  electron of the doubly occupied  $3d_{z^2}$  orbital to the singly occupied  $3d_{xz}$  (Figure S15). Because these two orbital states are mixed by the  $y$  component of the spin-orbit coupling operator,  $\lambda\hat{L}_y\hat{S}_y$ , we expect the largest  $g$ -tensor component to be aligned with the  $y$  molecular axis. Although this prediction is readily validated by the CP DFT calculations, the corresponding  $\Delta g_{\text{max}} = g_{\text{max}} - g_e$ , which ranges from 0.36 obtained using B3LYP to 0.20 predicted by TPSSH, is nearly one order of magnitude smaller than that observed experimentally for **4b**. This difference is likely caused by the fact that TD-DFT overestimates the energies of the lowest excited states. In contrast, our CAS(7,11) calculation suggests that the energy of the first excited state is nearly five times smaller than that predicted by TD-DFT. This lower energy leads to a much larger  $\Delta g_{\text{max}}$  value of 1.97, and to a set of theoretical  $g$  values which are more like the experimental values observed by EPR spectroscopy than those obtained using DFT. Despite the fact that the CAS(7,11) calculations yield charge and spin distributions comparable to those derived from DFT, the order of the two lowest orbital states is switched such that for the CASSCF ground state the unpaired electron occupies a  $3d_{z^2}$  orbital (Figure S16).

**Table S2.** DFT-predicted relative energies obtained for unabridged structural models derived from the experimental X-ray structures of **2a**, **2b**, **4b** and **3**.

| S                   | Funct. | Rel. En. [cm <sup>-1</sup> ] | (S <sup>2</sup> ) |
|---------------------|--------|------------------------------|-------------------|
| Imido, <b>2a</b>    |        |                              |                   |
| 0                   | b3lyp  | 1168                         | 1.05              |
| 0                   | rb3lyp | 8306                         | 0.00              |
| 1                   | b3lyp  | 0                            | 2.05              |
| 2                   | b3lyp  | 9824                         | 6.06              |
| 0                   | bp86   | 1291                         | 1.01              |
| 0                   | rbp86  | 5416                         | 0.00              |
| 1                   | bp86   | 0                            | 2.02              |
| 0                   | tpssh  | 1169                         | 1.06              |
| 0                   | rtssh  | 7428                         | 0.00              |
| 1                   | tpssh  | 0                            | 2.06              |
| Imido, <b>2b</b>    |        |                              |                   |
| 0                   | b3lyp  | 1316                         | 1.04              |
| 1                   | b3lyp  | 0                            | 2.04              |
| 0                   | bp86   | 1405                         | 1.01              |
| 1                   | bp86   | 0                            | 2.02              |
| 0                   | tpssh  | 1312                         | 1.04              |
| 1                   | tpssh  | 0                            | 2.05              |
| Amido, <b>4b</b>    |        |                              |                   |
| 1/2                 | b3lyp  | 0                            | 0.77              |
| 3/2                 | b3lyp  | 9619                         | 3.77              |
| 1/2                 | bp86   | 0                            | 0.76              |
| 3/2                 | bp86   | 12759                        | 3.76              |
| 1/2                 | tpssh  | 0                            | 0.78              |
| 3/2                 | tpssh  | 9986                         | 3.77              |
| Tetrazido, <b>3</b> |        |                              |                   |
| 0                   | b3lyp  | 945                          | 1.02              |
| 1                   | b3lyp  | 0                            | 2.03              |
| 2                   | b3lyp  | 7833                         | 6.03              |
| 0                   | bp86   | 914                          | 0.98              |
| 1                   | bp86   | 0                            | 2.02              |
| 2                   | bp86   | 11026                        | 6.02              |
| 0                   | tpssh  | 803                          | 1.02              |
| 1                   | tpssh  | 0                            | 2.03              |
| 2                   | tpssh  | 8748                         | 6.03              |



**Table S3.** Ligand and metal charges, see Scheme S2, inferred from the analysis of the Mulliken atomic charges and spins predicted using DFT for the imido complex **2a** and **2b** using an unabridged structural model derived from experimental X-ray structure.

| #                | Fnct.            | Mulliken atomic charges |         |        |        |         |        |        |         |        | Mulliken atomic spins |        |        |        |        |        |
|------------------|------------------|-------------------------|---------|--------|--------|---------|--------|--------|---------|--------|-----------------------|--------|--------|--------|--------|--------|
|                  |                  | b3lyp                   |         |        | bp86   |         |        | tpssh  |         |        | b3lyp                 |        | bp86   |        | tpssh  |        |
|                  |                  | 0                       | 0 (rks) | 1      | 0      | 0 (rks) | 1      | 0      | 0 (rks) | 1      | 0                     | 1      | 0      | 1      | 0      | 1      |
| 2a               | S                | 0.096                   | 0.072   | 0.097  | -0.075 | -0.089  | -0.069 | 0.186  | 0.164   | 0.190  | 0.794                 | 0.982  | 0.503  | 0.914  | 0.727  | 0.965  |
|                  | Co               | 0.215                   | 0.257   | 0.219  | 0.310  | 0.331   | 0.310  | 0.106  | 0.145   | 0.108  | -0.085                | -0.003 | -0.049 | 0.038  | -0.089 | -0.004 |
|                  | L <sub>PNP</sub> | -0.311                  | -0.329  | -0.316 | -0.235 | -0.242  | -0.241 | -0.292 | -0.308  | -0.298 | -0.709                | 1.021  | -0.455 | 1.047  | -0.638 | 1.039  |
|                  | P <sub>1</sub>   | 0.259                   | 0.242   | 0.258  | 0.209  | 0.194   | 0.208  | 0.006  | -0.009  | 0.005  | -0.044                | -0.004 | 0.002  | 0.002  | -0.045 | -0.004 |
|                  | P <sub>2</sub>   | 0.284                   | 0.296   | 0.282  | 0.235  | 0.242   | 0.232  | 0.049  | 0.060   | 0.046  | -0.044                | -0.005 | -0.042 | -0.003 | -0.047 | -0.004 |
|                  | Pyr              | -0.777                  | -0.755  | -0.776 | -0.793 | -0.775  | -0.793 | -0.687 | -0.660  | -0.686 | 0.025                 | 0.013  | 0.053  | 0.039  | 0.027  | 0.018  |
|                  | N <sub>PNP</sub> | -0.105                  | -0.091  | -0.104 | -0.031 | -0.021  | -0.032 | -0.135 | -0.120  | -0.135 | -0.022                | -0.032 | -0.012 | -0.026 | -0.030 | -0.038 |
|                  | N <sub>im</sub>  | -0.387                  | -0.344  | -0.381 | -0.259 | -0.243  | -0.254 | -0.359 | -0.325  | -0.353 | -0.339                | 0.686  | -0.078 | 0.707  | -0.275 | 0.720  |
|                  | C6               | -0.238                  | -0.268  | -0.245 | -0.356 | -0.368  | -0.363 | -0.125 | -0.155  | -0.134 | -0.372                | 0.331  | -0.384 | 0.336  | -0.369 | 0.317  |
|                  | 2b               | Co                      | 0.124   |        | 0.127  | -0.040  |        | -0.032 | 0.237   |        | 0.244                 | 0.791  | 1.033  | 0.482  | 0.968  | 0.718  |
| L <sub>PNP</sub> |                  | 0.203                   |         | 0.207  | 0.305  |         | 0.302  | 0.098  |         | 0.099  | -0.083                | 0.003  | -0.039 | 0.051  | -0.083 | 0.003  |
| L <sub>im</sub>  |                  | -0.326                  |         | -0.335 | -0.264 |         | -0.270 | -0.335 |         | -0.343 | -0.708                | 0.964  | -0.443 | 0.981  | -0.635 | 0.978  |
| P <sub>1</sub>   |                  | 0.285                   |         | 0.283  | 0.234  |         | 0.232  | 0.039  |         | 0.037  | -0.050                | 0.000  | -0.045 | 0.005  | -0.052 | 0.002  |
| P <sub>2</sub>   |                  | 0.270                   |         | 0.268  | 0.225  |         | 0.222  | 0.039  |         | 0.036  | -0.043                | -0.003 | -0.037 | 0.003  | -0.043 | -0.002 |
| Pyr              |                  | -0.813                  |         | -0.812 | -0.896 |         | -0.896 | -0.678 |         | -0.677 | 0.046                 | 0.045  | 0.063  | 0.066  | 0.055  | 0.055  |
| N <sub>PNP</sub> |                  | -0.082                  |         | -0.081 | -0.015 |         | -0.016 | -0.116 |         | -0.116 | -0.020                | -0.030 | -0.008 | -0.024 | -0.025 | -0.035 |
| N <sub>im</sub>  |                  | -0.375                  |         | -0.373 | -0.267 |         | -0.266 | -0.374 |         | -0.373 | -0.379                | 0.651  | -0.117 | 0.654  | -0.313 | 0.670  |
| C6               |                  | -1.000                  |         | -1.007 | -1.153 |         | -1.158 | -0.568 |         | -0.576 | -0.356                | 0.332  | -0.376 | 0.359  | -0.368 | 0.344  |

**Table S4.** Ligand and metal charges, see Scheme S2, inferred from the analysis of the Löwdin atomic charges and spins predicted using DFT for the imido complex **2a** using an unabridged structural model derived from experimental X-ray structure.

| Fnct.            | Löwdin atomic charges |        |        |        |        |        | Löwdin atomic spins |        |        |       |        |       |
|------------------|-----------------------|--------|--------|--------|--------|--------|---------------------|--------|--------|-------|--------|-------|
|                  | b3lyp                 |        | bp86   |        | tpssh  |        | b3lyp               |        | bp86   |       | tpssh  |       |
|                  | 0                     | 1      | 0      | 1      | 0      | 1      | 0                   | 1      | 0      | 1     | 0      | 1     |
| S                | -0.708                | -0.708 | -0.757 | -0.753 | -0.722 | -0.721 | 0.731               | 0.970  | 0.468  | 0.898 | 0.655  | 0.948 |
| Co               | 0.896                 | 0.901  | 0.918  | 0.920  | 0.898  | 0.903  | -0.037              | 0.026  | 0.008  | 0.075 | -0.024 | 0.043 |
| L <sub>PNP</sub> | -0.188                | -0.193 | -0.161 | -0.167 | -0.176 | -0.182 | -0.695              | 1.003  | -0.476 | 1.027 | -0.631 | 1.009 |
| P <sub>1</sub>   | 1.015                 | 1.015  | 0.996  | 0.996  | 1.003  | 1.003  | -0.032              | -0.002 | -0.028 | 0.005 | -0.032 | 0.000 |
| P <sub>2</sub>   | 1.017                 | 1.017  | 0.998  | 0.998  | 1.005  | 1.005  | -0.030              | -0.003 | -0.025 | 0.004 | -0.029 | 0.000 |
| Pyr              | -0.151                | -0.150 | -0.124 | -0.125 | -0.135 | -0.135 | 0.043               | 0.035  | 0.072  | 0.061 | 0.051  | 0.043 |
| N <sub>PNP</sub> | 0.210                 | 0.210  | 0.236  | 0.236  | 0.216  | 0.217  | 0.005               | 0.000  | 0.017  | 0.012 | 0.008  | 0.004 |
| N <sub>im</sub>  | 0.088                 | 0.090  | 0.128  | 0.128  | 0.100  | 0.101  | -0.294              | 0.560  | -0.105 | 0.558 | -0.242 | 0.561 |
| C6               | -0.214                | -0.219 | -0.236 | -0.240 | -0.212 | -0.216 | -0.354              | 0.393  | -0.328 | 0.415 | -0.345 | 0.399 |

**Table S5.** Ligand and metal charges, see Scheme S2, inferred from the analysis of the natural atomic charges and spins predicted using DFT for the imido complex **2a** using an unabridged structural model derived from experimental X-ray structure.

| Fnct.            | Natural atomic charges |        |        |        |        |        | Natural atomic spins |        |        |       |        |       |
|------------------|------------------------|--------|--------|--------|--------|--------|----------------------|--------|--------|-------|--------|-------|
|                  | b3lyp                  |        | bp86   |        | tpssh  |        | b3lyp                |        | bp86   |       | tpssh  |       |
|                  | 0                      | 1      | 0      | 1      | 0      | 1      | 0                    | 1      | 0      | 1     | 0      | 1     |
| S                | 0.489                  | 0.479  | 0.312  | 0.316  | 0.440  | 0.433  | 0.713                | 0.862  | 0.421  | 0.768 | 0.630  | 0.831 |
| Co               | 0.106                  | 0.112  | 0.212  | 0.209  | 0.134  | 0.138  | -0.035               | 0.049  | 0.008  | 0.095 | -0.022 | 0.068 |
| L <sub>PNP</sub> | -0.595                 | -0.591 | -0.524 | -0.525 | -0.574 | -0.571 | -0.678               | 1.089  | -0.429 | 1.136 | -0.608 | 1.100 |
| P <sub>1</sub>   | 1.070                  | 1.072  | 1.081  | 1.080  | 1.056  | 1.057  | -0.035               | 0.010  | -0.032 | 0.016 | -0.034 | 0.016 |
| P <sub>2</sub>   | 1.073                  | 1.074  | 1.084  | 1.082  | 1.059  | 1.059  | -0.033               | 0.010  | -0.030 | 0.015 | -0.031 | 0.016 |
| Pyr              | -0.936                 | -0.935 | -0.900 | -0.904 | -0.919 | -0.919 | 0.045                | 0.037  | 0.078  | 0.065 | 0.053  | 0.044 |
| N <sub>PNP</sub> | -0.569                 | -0.570 | -0.506 | -0.510 | -0.551 | -0.553 | 0.002                | -0.003 | 0.018  | 0.009 | 0.004  | 0.000 |
| N <sub>im</sub>  | -0.657                 | -0.642 | -0.556 | -0.549 | -0.630 | -0.617 | -0.319               | 0.739  | -0.068 | 0.759 | -0.252 | 0.747 |
| C6               | -0.303                 | -0.312 | -0.351 | -0.357 | -0.315 | -0.323 | -0.339               | 0.327  | -0.343 | 0.352 | -0.338 | 0.332 |

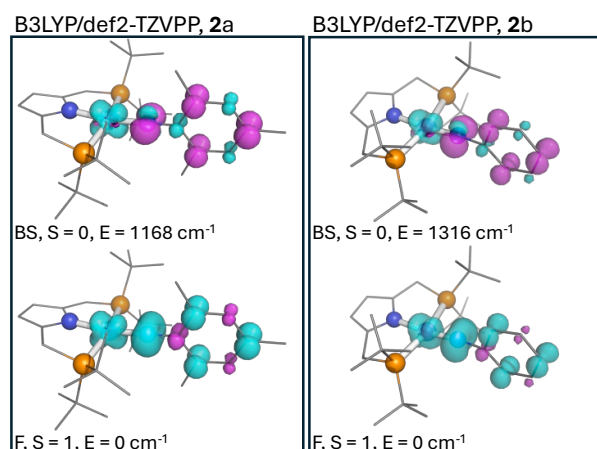

**Figure S10.** Spin densities plots obtained for **2a** (left) and **2b** (right) for the F, S = 1 states (bottom) and the BS, S = 0 (top) at the B3LYP/def2-TZVPP level of theory. Plots were obtained using an isosurface value of  $\pm 0.008$ .  $\alpha$  spin density is shown in purple and  $\beta$  spin density is shown in cyan.

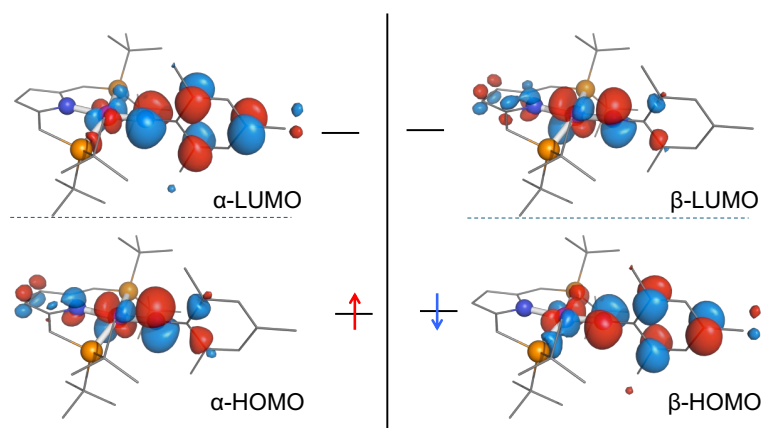

**Figure S11.** Spin-up,  $\alpha$  (left) and spin-down,  $\beta$  (right) HOMO and LUMO molecular orbitals obtained for the BS, S = 0 state of **2a** at the BP86/def2-TZVPP level of theory. The corresponding spin density is shown in the top right corner of Figure S11.

**Table S6.** DFT-predicted reduced Mulliken orbital charges and spins for the cobalt ion of **2a** using an unabridged structural model derived from the experimental X-ray structure.

| Funct.     | Mulliken reduced orbital charges |         |       |       |         |       |       |         |       | Mulliken reduced orbital spins |       |        |       |        |       |
|------------|----------------------------------|---------|-------|-------|---------|-------|-------|---------|-------|--------------------------------|-------|--------|-------|--------|-------|
|            | b3lyp                            |         |       | bp86  |         |       | tpssh |         |       | b3lyp                          |       | bp86   |       | tpssh  |       |
|            | 0                                | 0 (rks) | 1     | 0     | 0 (rks) | 1     | 0     | 0 (rks) | 1     | 0                              | 1     | 0      | 1     | 0      | 1     |
| $dz^2$     | 1.872                            | 1.878   | 1.878 | 1.863 | 1.860   | 1.866 | 1.856 | 1.863   | 1.861 | 0.042                          | 0.041 | 0.025  | 0.031 | 0.033  | 0.033 |
| $dxz$      | 1.261                            | 1.441   | 1.290 | 1.396 | 1.482   | 1.411 | 1.314 | 1.454   | 1.339 | 0.702                          | 0.676 | 0.548  | 0.539 | 0.655  | 0.633 |
| $dyz$      | 1.878                            | 1.837   | 1.876 | 1.835 | 1.814   | 1.834 | 1.863 | 1.829   | 1.863 | 0.005                          | 0.024 | -0.004 | 0.032 | 0.004  | 0.027 |
| $dx^2-y^2$ | 0.880                            | 0.899   | 0.886 | 1.000 | 1.009   | 1.004 | 0.891 | 0.904   | 0.896 | 0.070                          | 0.059 | 0.039  | 0.047 | 0.071  | 0.063 |
| $dx_y$     | 1.788                            | 1.664   | 1.752 | 1.674 | 1.619   | 1.649 | 1.760 | 1.668   | 1.727 | -0.079                         | 0.158 | -0.154 | 0.223 | -0.104 | 0.177 |

**Table S7.** DFT-predicted reduced Löwdin orbital charges and spins for the cobalt ion of **2a** using an unabridged structural model derived from the experimental X-ray structure.

| Funct.        | Löwdin reduced orbital charges |         |       |       |         |       |       |         |       | Löwdin reduced orbital spins |       |        |       |        |       |
|---------------|--------------------------------|---------|-------|-------|---------|-------|-------|---------|-------|------------------------------|-------|--------|-------|--------|-------|
|               | b3lyp                          |         |       | bp86  |         |       | tpssh |         |       | b3lyp                        |       | bp86   |       | tpssh  |       |
|               | 0                              | 0 (rks) | 1     | 0     | 0 (rks) | 1     | 0     | 0 (rks) | 1     | 0                            | 1     | 0      | 1     | 0      | 1     |
| $d_{z^2}$     | 1.954                          | 1.960   | 1.960 | 1.943 | 1.940   | 1.946 | 1.944 | 1.952   | 1.950 | 0.040                        | 0.039 | 0.024  | 0.029 | 0.030  | 0.031 |
| $d_{xz}$      | 1.379                          | 1.543   | 1.405 | 1.494 | 1.575   | 1.508 | 1.416 | 1.543   | 1.438 | 0.701                        | 0.678 | 0.554  | 0.547 | 0.656  | 0.637 |
| $d_{yz}$      | 1.933                          | 1.894   | 1.932 | 1.889 | 1.869   | 1.888 | 1.912 | 1.880   | 1.912 | 0.005                        | 0.026 | -0.005 | 0.033 | 0.003  | 0.029 |
| $d_{x^2-y^2}$ | 1.205                          | 1.224   | 1.211 | 1.298 | 1.305   | 1.303 | 1.236 | 1.248   | 1.241 | 0.056                        | 0.048 | 0.032  | 0.037 | 0.058  | 0.048 |
| $d_{xy}$      | 1.889                          | 1.769   | 1.855 | 1.778 | 1.721   | 1.755 | 1.854 | 1.763   | 1.824 | -0.097                       | 0.177 | -0.166 | 0.235 | -0.120 | 0.196 |

**Table S8.** DFT-predicted natural atomic orbital occupancies for the cobalt site and nitrogen atom of the imido ligand of **2a** using an unabridged structural model derived from the experimental X-ray structure.

| Funct.         | S       | Sp.            | Co    |       |       |               |           |       |       | N <sub>im</sub> |       |       |  |
|----------------|---------|----------------|-------|-------|-------|---------------|-----------|-------|-------|-----------------|-------|-------|--|
|                |         |                | dxy   | dxz   | dyz   | $d_{x^2-y^2}$ | $d_{z^2}$ | total | px    | py              | pz    | total |  |
| b3lyp          | 0       | $\alpha$       | 0.904 | 0.976 | 0.979 | 0.572         | 0.979     | 4.409 | 0.677 | 0.347           | 0.905 | 1.929 |  |
|                |         | $\beta$        | 0.964 | 0.316 | 0.977 | 0.502         | 0.944     | 3.703 | 0.676 | 0.818           | 0.745 | 2.239 |  |
|                |         | $\alpha+\beta$ | 1.868 | 1.292 | 1.956 | 1.074         | 1.923     | 8.112 | 1.353 | 1.165           | 1.650 | 4.168 |  |
|                | 0 (rks) |                | 1.750 | 1.492 | 1.917 | 1.102         | 1.932     | 8.192 | 1.342 | 1.249           | 1.477 | 4.067 |  |
|                | 1       | $\alpha$       | 0.979 | 0.977 | 0.985 | 0.571         | 0.980     | 4.492 | 0.685 | 0.830           | 0.917 | 2.432 |  |
|                |         | $\beta$        | 0.853 | 0.345 | 0.969 | 0.513         | 0.949     | 3.629 | 0.665 | 0.357           | 0.702 | 1.725 |  |
| $\alpha+\beta$ |         | 1.832          | 1.322 | 1.954 | 1.084 | 1.929         | 8.121     | 1.350 | 1.187 | 1.619           | 4.156 |       |  |
| bp86           | 0       | $\alpha$       | 0.818 | 0.968 | 0.962 | 0.621         | 0.973     | 4.343 | 0.673 | 0.432           | 0.896 | 2.001 |  |
|                |         | $\beta$        | 0.953 | 0.469 | 0.969 | 0.584         | 0.953     | 3.927 | 0.658 | 0.796           | 0.617 | 2.072 |  |
|                |         | $\alpha+\beta$ | 1.771 | 1.437 | 1.931 | 1.205         | 1.926     | 8.271 | 1.331 | 1.228           | 1.514 | 4.073 |  |
|                | 0 (rks) |                | 1.724 | 1.528 | 1.912 | 1.214         | 1.925     | 8.303 | 1.329 | 1.206           | 1.500 | 4.036 |  |
|                | 1       | $\alpha$       | 0.968 | 0.971 | 0.977 | 0.626         | 0.975     | 4.517 | 0.678 | 0.813           | 0.906 | 2.397 |  |
|                |         | $\beta$        | 0.776 | 0.481 | 0.953 | 0.584         | 0.953     | 3.748 | 0.651 | 0.431           | 0.589 | 1.671 |  |
| $\alpha+\beta$ |         | 1.744          | 1.452 | 1.930 | 1.210 | 1.929         | 8.265     | 1.329 | 1.244 | 1.495           | 4.068 |       |  |
| tpssh          | 0       | $\alpha$       | 0.877 | 0.973 | 0.973 | 0.592         | 0.972     | 4.387 | 0.674 | 0.371           | 0.901 | 1.946 |  |
|                |         | $\beta$        | 0.961 | 0.364 | 0.972 | 0.522         | 0.946     | 3.765 | 0.670 | 0.815           | 0.705 | 2.190 |  |
|                |         | $\alpha+\beta$ | 1.838 | 1.338 | 1.945 | 1.114         | 1.917     | 8.152 | 1.345 | 1.185           | 1.606 | 4.136 |  |
|                | 0 (rks) |                | 1.750 | 1.493 | 1.913 | 1.134         | 1.929     | 8.219 | 1.336 | 1.239           | 1.482 | 4.057 |  |
|                | 1       | $\alpha$       | 0.976 | 0.974 | 0.982 | 0.589         | 0.974     | 4.495 | 0.681 | 0.827           | 0.913 | 2.420 |  |
|                |         | $\beta$        | 0.829 | 0.388 | 0.962 | 0.533         | 0.950     | 3.663 | 0.662 | 0.377           | 0.666 | 1.705 |  |
| $\alpha+\beta$ |         | 1.805          | 1.363 | 1.944 | 1.123 | 1.924         | 8.158     | 1.342 | 1.204 | 1.579           | 4.126 |       |  |

**Table S9.** DFT-predicted natural atomic orbital spins for the cobalt site of **2a** using an unabridged structural model derived from the experimental X-ray structure.

| Funct. | S | Co     |       |        |               |           |       | N <sub>im</sub> |        |       |        |
|--------|---|--------|-------|--------|---------------|-----------|-------|-----------------|--------|-------|--------|
|        |   | dxy    | dxz   | dyz    | $d_{x^2-y^2}$ | $d_{z^2}$ | total | px              | py     | pz    | total  |
| b3lyp  | 0 | -0.061 | 0.660 | 0.002  | 0.070         | 0.035     | 0.705 | 0.001           | -0.471 | 0.160 | -0.310 |
|        | 1 | 0.126  | 0.632 | 0.016  | 0.058         | 0.031     | 0.863 | 0.019           | 0.472  | 0.215 | 0.707  |
| bp86   | 0 | -0.135 | 0.499 | -0.007 | 0.037         | 0.020     | 0.416 | 0.015           | -0.365 | 0.279 | -0.071 |
|        | 1 | 0.192  | 0.490 | 0.025  | 0.042         | 0.022     | 0.770 | 0.026           | 0.383  | 0.317 | 0.726  |
| tpssh  | 0 | -0.084 | 0.609 | 0.000  | 0.070         | 0.026     | 0.621 | 0.004           | -0.444 | 0.197 | -0.244 |
|        | 1 | 0.146  | 0.586 | 0.020  | 0.056         | 0.023     | 0.832 | 0.019           | 0.449  | 0.247 | 0.715  |

**Table S10.** DFT-predicted Löwdin bond orders for the metal ligand-bonds of **2a**.

| Funct. | S | Co-P <sub>1</sub> | Co-P <sub>2</sub> | Co-N <sub>PNP</sub> | Co-N <sub>im</sub> |
|--------|---|-------------------|-------------------|---------------------|--------------------|
| b3lyp  | 0 | 0.880             | 0.873             | 0.829               | 1.393              |
|        | 1 | 0.879             | 0.872             | 0.828               | 1.413              |
| bp86   | 0 | 0.911             | 0.904             | 0.843               | 1.460              |
|        | 1 | 0.909             | 0.901             | 0.840               | 1.463              |
| tpssh  | 0 | 0.896             | 0.890             | 0.835               | 1.423              |
|        | 1 | 0.896             | 0.888             | 0.833               | 1.436              |

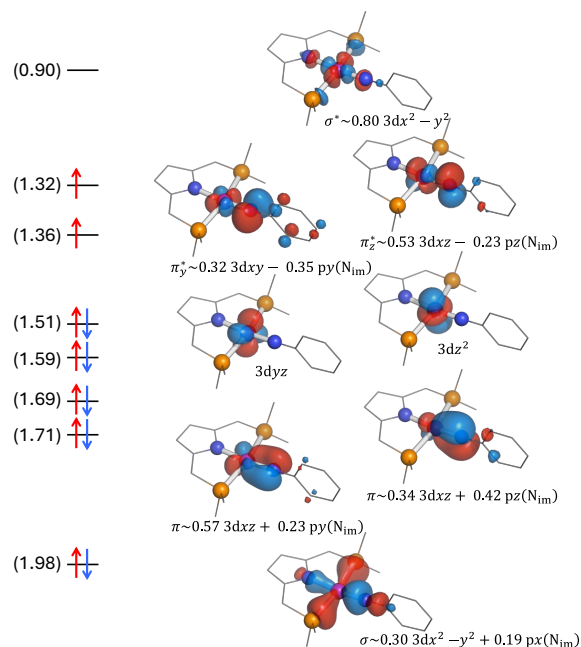

**Figure S12.** Dominant electronic configuration, that contributes 64.7%, of the ground state predicted by the CAS(8,12) calculations performed for a simplified structural model of **2a**. These calculations considered 25 triplet,  $S = 1$  states and 30 singlet,  $S = 0$  states. The numbers shown in parentheses indicate the predicted Löwdin orbital populations of the corresponding active space orbitals.

**Table S11.** Spin and charge distributions inferred from the Mulliken population analysis of the CAS(8,12) calculations performed for a simplified structural model of **2a**. The “GS S” entry below indicates the spin of the ground state (root 0).

| Nr roots         | 10 S = 1 |       | 25 S = 1<br>30 S = 0 |       | 25 S = 1<br>10 S = 2 |       | 25 S = 1<br>10 S = 2<br>30 S = 0 |       |
|------------------|----------|-------|----------------------|-------|----------------------|-------|----------------------------------|-------|
|                  | charge   | spin  | charge               | spin  | charge               | spin  | charge                           | spin  |
| GS S             | 1        |       | 1                    |       | 2                    |       | 2                                |       |
| Co               | 0.683    | 1.715 | 0.675                | 0.854 | 0.704                | 2.300 | 0.692                            | 1.528 |
| L <sub>PNP</sub> | -0.210   | 0.066 | -0.675               | 0.146 | -0.704               | 0.700 | -0.692                           | 0.472 |
| L <sub>im</sub>  | -0.474   | 0.220 | 0.000                | 0.000 | 0.000                | 0.000 | 0.000                            | 0.000 |
| P <sub>1</sub>   | 0.247    | 0.020 | 0.249                | 0.010 | 0.242                | 0.030 | 0.245                            | 0.021 |
| P <sub>2</sub>   | 0.206    | 0.019 | 0.208                | 0.010 | 0.200                | 0.029 | 0.204                            | 0.021 |
| P <sub>yr</sub>  | -0.659   | 0.020 | -0.657               | 0.010 | -0.662               | 0.029 | -0.660                           | 0.020 |
| N <sub>PNP</sub> | -0.287   | 0.014 | -0.286               | 0.007 | -0.291               | 0.021 | -0.289                           | 0.015 |
| N <sub>im</sub>  | -0.450   | 0.184 | 0.000                | 0.000 | 0.000                | 0.000 | 0.000                            | 0.000 |
| C <sub>6</sub>   | -0.301   | 0.034 | 0.000                | 0.000 | 0.000                | 0.000 | 0.000                            | 0.000 |

**Table S12.** Composition of the lowest triplet,  $S = 1$  state predicted by the CAS(8,12) calculations of **2a**.

| 10 S = 1           |          | 25 S = 1<br>30 S = 0 |          | 25 S = 1<br>10 S = 2 |          | 25 S = 1<br>10 S = 2<br>30 S = 0 |          |
|--------------------|----------|----------------------|----------|----------------------|----------|----------------------------------|----------|
| Spin of root 0 = 1 |          | Spin of root 0 = 1   |          | Spin of root 0 = 2   |          | Spin of root 0 = 2               |          |
| c                  | config   | c                    | config   | c                    | config   | c                                | config   |
| 0.643              | 22222110 | 0.647                | 22222110 | 0.607                | 22222110 | 0.665                            | 22222200 |
| 0.052              | 21122220 | 0.053                | 21122220 | 0.054                | 21122220 | 0.162                            | 22022220 |
| 0.032              | 22122120 | 0.048                | 22122120 | 0.048                | 22222101 | 0.030                            | 22222110 |
| 0.025              | 22222101 | 0.035                | 22222101 | 0.031                | 22122120 | 0.027                            | 22122210 |
| 0.019              | 22222011 | 0.019                | 22221111 | 0.017                | 22221111 | 0.027                            | 22221201 |
| 0.016              | 22221111 | 0.018                | 21222201 | 0.017                | 21122211 | 0.010                            | 12122211 |
| 0.014              | 22122210 | 0.018                | 21122211 | 0.016                | 21222201 | 0.008                            | 12222201 |
| 0.013              | 21122211 | 0.012                | 21022221 | 0.012                | 22222011 | 0.008                            | 22021221 |
| 0.012              | 21022221 | 0.011                | 11222211 | 0.012                | 21022221 | 0.006                            | 22121211 |
| 0.009              | 21222111 | 0.009                | 22022121 | 0.011                | 22022121 | 0.005                            | 22202202 |
| 0.009              | 22111221 | 0.008                | 21222210 | 0.011                | 11222211 | 0.005                            | 22221210 |
| 0.009              | 21222201 | 0.008                | 22212201 | 0.011                | 12222111 | 0.005                            | 22122120 |
| 0.009              | 11222211 | 0.008                | 22111221 | 0.010                | 22111221 | 0.005                            | 22202202 |
| 0.008              | 22220112 | 0.007                | 22220112 | 0.010                | 22122111 | 0.003                            | 22212111 |
| 0.007              | 12222111 | 0.007                | 22221120 | 0.009                | 22212201 | 0.003                            | 22022211 |
| 0.006              | 22022121 | 0.007                | 22211211 | 0.008                | 22212210 |                                  |          |
| 0.006              | 22212210 | 0.006                | 12222111 | 0.008                | 22220112 |                                  |          |
| 0.005              | 21122121 | 0.006                | 22122111 | 0.008                | 21222210 |                                  |          |
| 0.005              | 21222210 | 0.005                | 12122121 | 0.007                | 22211211 |                                  |          |
| 0.005              | 22202112 | 0.005                | 22112220 | 0.006                | 12122121 |                                  |          |
| 0.004              | 22122111 | 0.005                | 22202112 | 0.006                | 22122210 |                                  |          |
| 0.004              | 22212201 | 0.004                | 22212210 | 0.006                | 21222120 |                                  |          |
| 0.004              | 22221120 | 0.004                | 22222011 | 0.006                | 22221120 |                                  |          |
| 0.004              | 22211211 | 0.004                | 22121121 | 0.005                | 22202112 |                                  |          |
| 0.004              | 22212111 | 0.004                | 21212121 | 0.005                | 21222111 |                                  |          |
| 0.004              | 22211121 | 0.003                | 22112211 | 0.003                | 22112211 |                                  |          |
| 0.004              | 11222121 | 0.003                | 21121221 | 0.003                | 22221210 |                                  |          |
| 0.004              | 22221201 | 0.003                | 22211220 | 0.003                | 22112220 |                                  |          |
| 0.004              | 12122121 |                      |          | 0.003                | 21212121 |                                  |          |
| 0.003              | 21222021 |                      |          | 0.003                | 21121221 |                                  |          |
| 0.003              | 22022211 |                      |          | 0.003                | 22221201 |                                  |          |
| 0.003              | 22221210 |                      |          | 0.003                | 22012221 |                                  |          |
| 0.003              | 22112220 |                      |          | 0.003                | 22211220 |                                  |          |
| 0.003              | 22112211 |                      |          | 0.003                | 21221211 |                                  |          |
| 0.003              | 22211220 |                      |          | 0.003                | 20222211 |                                  |          |
| 0.003              | 21212121 |                      |          |                      |          |                                  |          |
| 0.003              | 21121221 |                      |          |                      |          |                                  |          |
| 0.003              | 22121121 |                      |          |                      |          |                                  |          |

**Table S13.** Zero field splitting parameters and g tensors derived from the CAS(8,12) calculations of **2a**. Values obtained using the effective Hamiltonian approach implemented in ORCA.

| CAS(8,12)                    | GS S | D<br>[cm <sup>-1</sup> ] | E/D   | principal g-tensor<br>components |       |       |
|------------------------------|------|--------------------------|-------|----------------------------------|-------|-------|
| 10 S = 1                     | 3    | 41.08                    | 0.321 | 1.885                            | 2.035 | 2.429 |
| 25 S = 1, 30 S = 0           | 3    | 92.04                    | 0.079 | 1.838                            | 2.024 | 2.341 |
| 25 S = 1, 10 S = 2           | 5    | -41.34                   | 0.022 | 1.996                            | 2.011 | 2.562 |
| 25 S = 1, 10 S = 2, 30 S = 0 | 5    | -40.63                   | 0.025 | 1.996                            | 2.012 | 2.549 |

**Table S14.** Ligand and metal charges, see Scheme S2, inferred from the analysis of the Mulliken atomic charges and spins predicted using DFT for the amido complexes using unabridged structural models derived from experimental X-ray structures.

| Fnct.                 | Mulliken atomic charges |        |        |        |        |        |        |        |        |
|-----------------------|-------------------------|--------|--------|--------|--------|--------|--------|--------|--------|
|                       | b3lyp                   |        |        | bp86   |        |        | tpssh  |        |        |
| S                     | 1/2                     | 1/2    | 3/2    | 1/2    | 1/2    | 3/2    | 1/2    | 1/2    | 3/2    |
| Cp.                   | 4a                      | 4b     | 4b     | 4a     | 4b     | 4b     | 4a     | 4b     | 4b     |
| Co                    | 0.241                   | 0.124  | 0.207  | 0.053  | -0.055 | 0.031  | 0.261  | 0.202  | 0.310  |
| L <sub>PNP</sub>      | 0.136                   | 0.264  | 0.116  | 0.196  | 0.331  | 0.169  | 0.053  | 0.154  | -0.018 |
| L <sub>am</sub>       | -0.994                  | -0.388 | -0.323 | -0.959 | -0.276 | -0.200 | -0.688 | -0.356 | -0.291 |
| P <sub>1</sub>        | 0.244                   | 0.249  | 0.197  | 0.190  | 0.197  | 0.151  | 0.012  | 0.005  | -0.050 |
| P <sub>2</sub>        | 0.199                   | 0.201  | 0.175  | 0.152  | 0.155  | 0.128  | -0.014 | -0.029 | -0.058 |
| N <sub>PNP</sub>      | -0.114                  | -0.111 | -0.130 | -0.040 | -0.042 | -0.067 | -0.146 | -0.150 | -0.179 |
| pyr                   | -0.794                  | -0.748 | -0.753 | -0.813 | -0.761 | -0.768 | -0.697 | -0.651 | -0.675 |
| N <sub>am</sub>       | -0.364                  | -0.162 | -0.140 | -0.271 | -0.074 | -0.050 | -0.374 | -0.190 | -0.170 |
| H <sub>am</sub>       | 0.036                   | -0.104 | -0.102 | 0.052  | -0.077 | -0.076 | 0.072  | -0.052 | -0.050 |
| C6                    | -1.034                  | -1.095 | -1.050 | -1.163 | -1.185 | -1.129 | -0.602 | -0.729 | -0.677 |
| Mulliken atomic spins |                         |        |        |        |        |        |        |        |        |
| Co                    | 0.994                   | 1.025  | 2.475  | 0.825  | 0.868  | 2.249  | 0.967  | 1.009  | 2.471  |
| L <sub>PNP</sub>      | -0.044                  | -0.054 | 0.308  | 0.006  | -0.006 | 0.406  | -0.043 | -0.058 | 0.277  |
| L <sub>am</sub>       | 0.040                   | 0.030  | 0.217  | 0.142  | 0.138  | 0.345  | 0.062  | 0.049  | 0.251  |
| P <sub>1</sub>        | -0.025                  | -0.034 | 0.101  | -0.020 | -0.028 | 0.138  | -0.025 | -0.035 | 0.104  |
| P <sub>2</sub>        | -0.022                  | -0.021 | 0.078  | -0.016 | -0.018 | 0.108  | -0.024 | -0.022 | 0.080  |
| N <sub>PNP</sub>      | -0.024                  | -0.023 | 0.058  | -0.009 | -0.006 | 0.066  | -0.029 | -0.028 | 0.047  |
| pyr                   | 0.020                   | 0.016  | 0.103  | 0.055  | 0.052  | 0.144  | 0.025  | 0.019  | 0.089  |
| N <sub>am</sub>       | 0.037                   | 0.005  | 0.147  | 0.127  | 0.072  | 0.207  | 0.058  | 0.015  | 0.162  |
| H <sub>am</sub>       | 0.000                   | 0.000  | 0.005  | 0.000  | 0.000  | 0.007  | 0.001  | 0.000  | 0.007  |
| C6                    | 0.013                   | 0.027  | 0.069  | 0.035  | 0.072  | 0.144  | 0.017  | 0.037  | 0.089  |

**Table S15.** Ligand and metal charges, see Scheme S2, inferred from the analysis of the Löwdin atomic charges and spins predicted using DFT for the amido complexes using unabridged structural models derived from the experimental X-ray structures.

| Fnct.               | Löwdin atomic charges |        |        |        |        |        |        |        |        |
|---------------------|-----------------------|--------|--------|--------|--------|--------|--------|--------|--------|
|                     | b3lyp                 |        |        | bp86   |        |        | tpssh  |        |        |
| S                   | 1/2                   | 1/2    | 3/2    | 1/2    | 1/2    | 3/2    | 1/2    | 1/2    | 3/2    |
| Cp.                 | 4a                    | 4b     | 4b     | 4a     | 4b     | 4b     | 4a     | 4b     | 4b     |
| Co                  | -0.608                | -0.573 | -0.421 | -0.688 | -0.652 | -0.519 | -0.627 | -0.589 | -0.437 |
| L <sub>PNP</sub>    | 0.844                 | 0.875  | 0.688  | 0.841  | 0.874  | 0.685  | 0.840  | 0.870  | 0.670  |
| L <sub>am</sub>     | -0.043                | -0.301 | -0.266 | 0.028  | -0.222 | -0.166 | -0.013 | -0.280 | -0.233 |
| P <sub>1</sub>      | 1.010                 | 1.011  | 0.968  | 0.986  | 0.988  | 0.945  | 0.996  | 0.997  | 0.954  |
| P <sub>2</sub>      | 0.997                 | 1.003  | 0.969  | 0.977  | 0.983  | 0.949  | 0.985  | 0.992  | 0.957  |
| N <sub>PNP</sub>    | 0.206                 | 0.208  | 0.183  | 0.235  | 0.237  | 0.215  | 0.213  | 0.214  | 0.189  |
| pyr                 | -0.145                | -0.146 | -0.179 | -0.117 | -0.117 | -0.143 | -0.129 | -0.131 | -0.170 |
| N <sub>am</sub>     | 0.280                 | 0.391  | 0.387  | 0.328  | 0.433  | 0.436  | 0.291  | 0.399  | 0.400  |
| H <sub>am</sub>     | -0.258                | -0.379 | -0.377 | -0.248 | -0.366 | -0.364 | -0.253 | -0.372 | -0.370 |
| C6                  | 0.141                 | -0.011 | 0.022  | 0.146  | 0.009  | 0.054  | 0.158  | 0.005  | 0.044  |
| Löwdin atomic spins |                       |        |        |        |        |        |        |        |        |
| Co                  | 0.953                 | 0.976  | 2.419  | 0.796  | 0.826  | 2.172  | 0.920  | 0.946  | 2.369  |
| L <sub>PNP</sub>    | -0.018                | 0.090  | 0.340  | 0.028  | 0.020  | 0.441  | -0.009 | -0.017 | 0.346  |
| L <sub>am</sub>     | 0.059                 | 0.059  | 0.241  | 0.156  | 0.154  | 0.388  | 0.080  | 0.071  | 0.286  |
| P <sub>1</sub>      | -0.020                | 0.024  | 0.082  | -0.017 | -0.019 | 0.097  | -0.020 | -0.023 | 0.087  |
| P <sub>2</sub>      | -0.018                | 0.016  | 0.070  | -0.012 | -0.012 | 0.089  | -0.019 | -0.016 | 0.075  |
| N <sub>PNP</sub>    | 0.000                 | 0.000  | 0.069  | 0.015  | 0.017  | 0.084  | 0.003  | 0.003  | 0.065  |
| pyr                 | 0.035                 | 0.030  | 0.110  | 0.067  | 0.063  | 0.151  | 0.043  | 0.037  | 0.102  |
| N <sub>am</sub>     | 0.040                 | 0.017  | 0.134  | 0.101  | 0.065  | 0.191  | 0.055  | 0.028  | 0.153  |
| H <sub>am</sub>     | 0.008                 | 0.005  | 0.026  | 0.017  | 0.015  | 0.038  | 0.010  | 0.007  | 0.030  |
| C6                  | 0.014                 | 0.033  | 0.076  | 0.042  | 0.071  | 0.149  | 0.020  | 0.034  | 0.097  |

**Table S16.** Ligand and metal charges, see Scheme S2, derived from the natural population analysis using DFT predicted SCF density of the amido complexes using unabridged structural models derived from experimental X-ray structures.

| Natural atomic charges |                    |           |           |           |           |           |           |           |
|------------------------|--------------------|-----------|-----------|-----------|-----------|-----------|-----------|-----------|
| Funct.                 | b3lyp <sup>a</sup> |           | bp86      |           |           | tpssh     |           |           |
| S                      | 1/2                | 3/2       | 1/2       | 1/2       | 3/2       | 1/2       | 1/2       | 3/2       |
| <b>Cp.</b>             | <b>4b</b>          | <b>4b</b> | <b>4a</b> | <b>4b</b> | <b>4b</b> | <b>4a</b> | <b>4b</b> | <b>4b</b> |
| <b>Co</b>              | 0.570              | 1.013     | 0.357     | 0.352     | 0.779     | 0.531     | 0.520     | 0.975     |
| <b>L<sub>PNP</sub></b> | 0.027              | -0.402    | 0.086     | 0.122     | -0.314    | 0.011     | 0.046     | -0.411    |
| <b>L<sub>am</sub></b>  | -0.597             | -0.610    | -1.263    | -0.474    | -0.464    | -1.288    | -0.566    | -0.564    |
| <b>P<sub>1</sub></b>   | 1.058              | 0.874     | 1.050     | 1.068     | 0.882     | 1.021     | 1.040     | 0.849     |
| <b>P<sub>2</sub></b>   | 0.973              | 0.837     | 0.978     | 0.982     | 0.845     | 0.953     | 0.957     | 0.814     |
| <b>N<sub>PNP</sub></b> | -0.582             | -0.682    | -0.516    | -0.512    | -0.607    | -0.570    | -0.564    | -0.667    |
| <b>pyr</b>             | -0.949             | -1.051    | -0.902    | -0.907    | -0.997    | -0.928    | -0.933    | -1.046    |
| <b>N<sub>am</sub></b>  | -0.814             | -0.861    | -0.773    | -0.705    | -0.744    | -0.856    | -0.782    | -0.820    |
| <b>H<sub>am</sub></b>  | 0.289              | 0.290     | 0.319     | 0.290     | 0.293     | 0.315     | 0.287     | 0.287     |
| <b>C6</b>              | -0.791             | -0.759    | -1.597    | -0.813    | -0.768    | -1.472    | -0.779    | -0.741    |
| Natural atomic spins   |                    |           |           |           |           |           |           |           |
| <b>Co</b>              | 0.951              | 2.270     | 0.741     | 0.782     | 1.993     | 0.880     | 0.917     | 2.217     |
| <b>L<sub>PNP</sub></b> | -0.008             | 0.450     | 0.050     | 0.043     | 0.570     | 0.013     | 0.003     | 0.455     |
| <b>L<sub>am</sub></b>  | 0.057              | 0.280     | 0.182     | 0.175     | 0.437     | 0.094     | 0.080     | 0.328     |
| <b>P<sub>1</sub></b>   | -0.021             | 0.146     | -0.010    | -0.016    | 0.168     | -0.010    | -0.019    | 0.154     |
| <b>P<sub>2</sub></b>   | -0.011             | 0.120     | -0.010    | -0.006    | 0.148     | -0.014    | -0.008    | 0.128     |
| <b>N<sub>PNP</sub></b> | 0.002              | 0.109     | 0.024     | 0.025     | 0.134     | 0.005     | 0.005     | 0.106     |
| <b>pyr</b>             | 0.037              | 0.144     | 0.081     | 0.075     | 0.196     | 0.051     | 0.044     | 0.137     |
| <b>N<sub>am</sub></b>  | 0.031              | 0.222     | 0.164     | 0.109     | 0.311     | 0.090     | 0.047     | 0.254     |
| <b>H<sub>am</sub></b>  | 0.001              | -0.002    | -0.001    | 0.000     | -0.002    | 0.000     | 0.000     | -0.003    |
| <b>C6</b>              | 0.025              | 0.060     | 0.032     | 0.068     | 0.131     | 0.014     | 0.033     | 0.079     |

a) Natural population analysis failed to complete for **4a**.

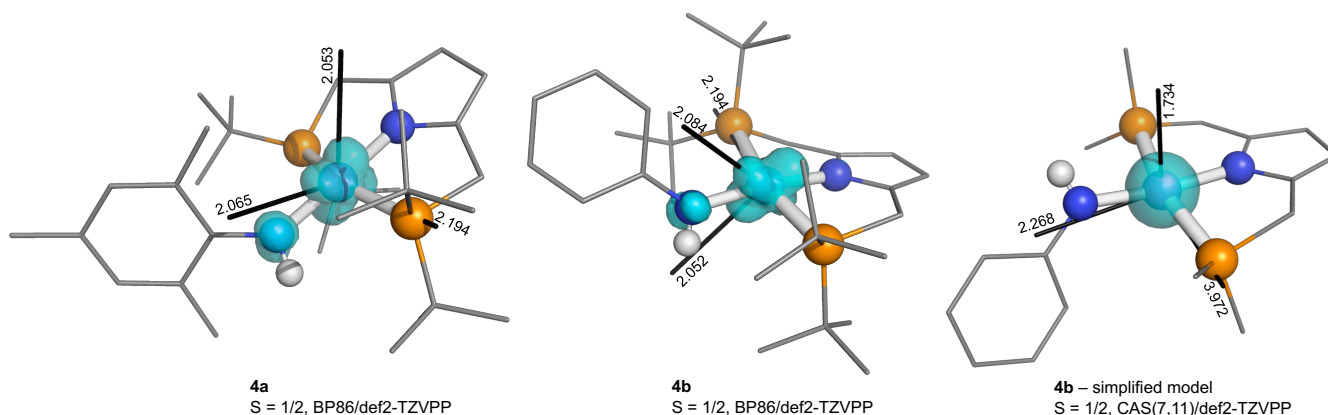

**Figure S13.** Plots of the predicted spin densities obtained for **4a** (left) and **4b** (middle) at the BP86/def2-TZVPP level of theory using unabridged structural models derived from the experimental structures. In addition, shown on the right is the CAS(7,11) predicted spin density obtained for a simplified structural model derived from the experimental structure of **4b**. These plots were obtained using an isosurface value of  $\pm 0.008$ . Spin-up,  $\alpha$  spin density is shown in purple and spin-down,  $\beta$  spin density is shown in cyan. The axes, shown in black, and their labels indicate the orientation and principal values of the corresponding theoretical  $\mathbf{g}$  tensors. Except for H<sub>am</sub> all other hydrogen atoms are omitted.

**Table S17.** DFT-predicted reduced Mulliken orbital charges and spins for the cobalt ion the amido complex using an unabridged structural model derived from the experimental X-ray structure.

| Funct.                          | Mulliken reduced orbital charges |       |       |       |       |       |       |       |       |
|---------------------------------|----------------------------------|-------|-------|-------|-------|-------|-------|-------|-------|
|                                 | b3lyp                            |       |       | bp86  |       |       | tpssh |       |       |
|                                 | 1/2                              | 1/2   | 3/2   | 1/2   | 1/2   | 3/2   | 1/2   | 1/2   | 3/2   |
| Cmp.                            | 4a                               | 4b    | 4b    | 4a    | 4b    | 4b    | 4a    | 4b    | 4b    |
| dz <sup>2</sup>                 | 1.882                            | 1.885 | 1.455 | 1.876 | 1.884 | 1.485 | 1.870 | 1.866 | 1.318 |
| dxz                             | 1.171                            | 1.161 | 1.349 | 1.297 | 1.279 | 1.377 | 1.217 | 1.206 | 1.461 |
| dyz                             | 1.892                            | 1.888 | 1.795 | 1.844 | 1.843 | 1.821 | 1.881 | 1.873 | 1.789 |
| dx <sup>2</sup> -y <sup>2</sup> | 0.856                            | 0.901 | 1.434 | 0.957 | 1.005 | 1.465 | 0.873 | 0.900 | 1.393 |
| dxy                             | 1.896                            | 1.893 | 1.520 | 1.847 | 1.835 | 1.549 | 1.888 | 1.887 | 1.600 |
| Mulliken reduced orbital spins  |                                  |       |       |       |       |       |       |       |       |
| dz <sup>2</sup>                 | 0.036                            | 0.045 | 0.509 | 0.019 | 0.021 | 0.463 | 0.030 | 0.044 | 0.638 |
| dxz                             | 0.811                            | 0.829 | 0.655 | 0.669 | 0.697 | 0.615 | 0.772 | 0.790 | 0.549 |
| dyz                             | 0.012                            | 0.014 | 0.146 | 0.016 | 0.017 | 0.093 | 0.013 | 0.017 | 0.146 |
| dx <sup>2</sup> -y <sup>2</sup> | 0.088                            | 0.080 | 0.635 | 0.065 | 0.060 | 0.570 | 0.095 | 0.085 | 0.630 |
| dxy                             | 0.018                            | 0.023 | 0.430 | 0.031 | 0.040 | 0.370 | 0.020 | 0.026 | 0.346 |

**Table S18.** DFT-predicted reduced Löwdin orbital charges and spins obtained for the cobalt ions of the amido complexes using unabridged structural models derived from the experimental X-ray structures.

| Funct.                          | Löwdin reduced orbital charges |       |       |       |       |       |       |       |       |
|---------------------------------|--------------------------------|-------|-------|-------|-------|-------|-------|-------|-------|
|                                 | b3lyp                          |       |       | bp86  |       |       | tpssh |       |       |
|                                 | 1/2                            | 1/2   | 3/2   | 1/2   | 1/2   | 3/2   | 1/2   | 1/2   | 3/2   |
| Cmp.                            | 4a                             | 4b    | 4b    | 4a    | 4b    | 4b    | 4a    | 4b    | 4b    |
| dz <sup>2</sup>                 | 1.979                          | 1.963 | 1.530 | 1.969 | 1.962 | 1.558 | 1.965 | 1.950 | 1.396 |
| dxz                             | 1.270                          | 1.241 | 1.422 | 1.383 | 1.348 | 1.441 | 1.300 | 1.273 | 1.521 |
| dyz                             | 1.953                          | 1.945 | 1.849 | 1.904 | 1.897 | 1.871 | 1.933 | 1.924 | 1.839 |
| dx <sup>2</sup> -y <sup>2</sup> | 1.164                          | 1.187 | 1.736 | 1.241 | 1.266 | 1.742 | 1.191 | 1.212 | 1.728 |
| dxy                             | 1.982                          | 1.984 | 1.610 | 1.926 | 1.920 | 1.632 | 1.966 | 1.967 | 1.677 |
| Löwdin reduced orbital spins    |                                |       |       |       |       |       |       |       |       |
| dz <sup>2</sup>                 | 0.034                          | 0.043 | 0.509 | 0.018 | 0.020 | 0.462 | 0.028 | 0.041 | 0.638 |
| dxz                             | 0.807                          | 0.823 | 0.654 | 0.669 | 0.693 | 0.615 | 0.770 | 0.785 | 0.548 |
| dyz                             | 0.012                          | 0.015 | 0.148 | 0.016 | 0.018 | 0.095 | 0.014 | 0.017 | 0.148 |
| dx <sup>2</sup> -y <sup>2</sup> | 0.073                          | 0.064 | 0.655 | 0.054 | 0.047 | 0.589 | 0.078 | 0.065 | 0.647 |
| dxy                             | 0.020                          | 0.025 | 0.431 | 0.034 | 0.043 | 0.373 | 0.023 | 0.029 | 0.349 |

**Table S19.** DFT-predicted natural atomic orbital occupancies obtained for the cobalt site of the amido complex **4b** obtained for an unabridged structural model derived from the experimental X-ray structure.

| Funct. | S   | Sp. | dxy   | dxz   | dyz   | dx <sup>2</sup> -y <sup>2</sup> | dz <sup>2</sup> |
|--------|-----|-----|-------|-------|-------|---------------------------------|-----------------|
| b3lyp  | 1/2 | α   | 0.980 | 0.980 | 0.986 | 0.553                           | 0.982           |
|        |     | β   | 0.961 | 0.175 | 0.978 | 0.475                           | 0.944           |
|        |     | α+β | 1.941 | 1.156 | 1.964 | 1.028                           | 1.926           |
|        | 3/2 | α   | 0.985 | 0.982 | 0.991 | 0.972                           | 0.988           |
|        |     | β   | 0.558 | 0.346 | 0.851 | 0.426                           | 0.482           |
|        |     | α+β | 1.542 | 1.328 | 1.841 | 1.398                           | 1.470           |
| bp86   | 1/2 | α   | 0.968 | 0.975 | 0.975 | 0.600                           | 0.977           |
|        |     | β   | 0.933 | 0.310 | 0.964 | 0.547                           | 0.962           |
|        |     | α+β | 1.902 | 1.285 | 1.939 | 1.147                           | 1.939           |
|        | 3/2 | α   | 0.977 | 0.978 | 0.985 | 0.957                           | 0.985           |
|        |     | β   | 0.612 | 0.388 | 0.900 | 0.487                           | 0.527           |
|        |     | α+β | 1.590 | 1.366 | 1.885 | 1.444                           | 1.512           |
| tpssh  | 1/2 | α   | 0.976 | 0.978 | 0.982 | 0.571                           | 0.977           |
|        |     | β   | 0.954 | 0.215 | 0.971 | 0.492                           | 0.940           |
|        |     | α+β | 1.930 | 1.193 | 1.953 | 1.063                           | 1.917           |
|        | 3/2 | α   | 0.981 | 0.981 | 0.989 | 0.967                           | 0.987           |
|        |     | β   | 0.638 | 0.453 | 0.848 | 0.429                           | 0.349           |
|        |     | α+β | 1.619 | 1.435 | 1.836 | 1.396                           | 1.336           |



**Table S20.** DFT-predicted natural atomic orbital spins obtained for the cobalt site of the amido complex **4b** using an unabridged structural model derived from the experimental X-ray structure.

| Funct. | S   | d <sub>xy</sub> | d <sub>xz</sub> | d <sub>yz</sub> | d <sub>x<sup>2</sup>-y<sup>2</sup></sub> | d <sub>z<sup>2</sup></sub> |
|--------|-----|-----------------|-----------------|-----------------|------------------------------------------|----------------------------|
| b3lyp  | 1/2 | 0.019           | 0.805           | 0.008           | 0.078                                    | 0.038                      |
|        | 3/2 | 0.427           | 0.637           | 0.140           | 0.546                                    | 0.506                      |
| bp86   | 1/2 | 0.035           | 0.665           | 0.011           | 0.054                                    | 0.015                      |
|        | 3/2 | 0.365           | 0.591           | 0.086           | 0.470                                    | 0.458                      |
| tpssh  | 1/2 | 0.022           | 0.763           | 0.011           | 0.079                                    | 0.037                      |
|        | 3/2 | 0.343           | 0.528           | 0.141           | 0.539                                    | 0.638                      |

**Table S21.** Analysis of the time-dependent (TD) DFT calculations performed for **4b** using an unabridged structural model derived from the experimental X-ray structure.

| Funct. | TD # | Energy [cm <sup>-1</sup> ] | Initial MO |                |                  | Final MO       |                                |                                | TD coeff. |
|--------|------|----------------------------|------------|----------------|------------------|----------------|--------------------------------|--------------------------------|-----------|
|        |      |                            | MO #       | Major Contrib. | MO #             | Major Contrib. |                                |                                |           |
| b3lyp  | 1    | 3892                       | 140 β      | 76             | z <sup>2</sup>   | 143 β          | 72                             | xz                             | 0.85      |
|        | 2    | 8009                       | 139 β      | 82             | yz               | 143 β          | 72                             | xz                             | 0.79      |
|        | 3    | 9750                       | 137 β      | 20             | xy               | 143 β          | 72                             | xz                             | 0.16      |
|        |      |                            | 135 β      | 24             | xy               | 143 β          | 72                             | xz                             | 0.11      |
|        |      |                            | 138 β      | 19             | xy               | 143 β          | 72                             | xz                             | 0.15      |
|        |      |                            | 142 β      | 5              | xz               | 143 β          | 72                             | xz                             | 0.33      |
|        | 4    | 14746                      | 140 α      | 76             | z <sup>2</sup>   | 144 α          | 48                             | x <sup>2</sup> -y <sup>2</sup> | 0.36      |
| 140 β  |      |                            | 76         | z <sup>2</sup> | 144 β            | 37             | x <sup>2</sup> -y <sup>2</sup> | 0.34                           |           |
| bp86   | 1    | 5009                       | 142 β      | 77             | z <sup>2</sup>   | 143 β          | 66                             | xz                             | 0.93      |
|        | 2    | 8563                       | 140 β      | 78             | yz               | 143 β          | 66                             | xz                             | 0.94      |
|        | 3    | 8983                       | 141 β      | 36             | xy               | 143 β          | 66                             | xz                             | 0.84      |
|        | 4    | 12619                      | 139 β      | n.a.           | π <sub>cor</sub> | 143 β          | 66                             | xz                             | 0.99      |
|        | 5    | 15352                      | 142 α      | 81             | z <sup>2</sup>   | 144 α          | 48                             | x <sup>2</sup> -y <sup>2</sup> | 0.46      |
|        |      |                            | 142 β      | 77             | z <sup>2</sup>   | 144 β          | 49                             | x <sup>2</sup> -y <sup>2</sup> | 0.51      |
| tpssh  | 1    | 5874                       | 140 β      | 76             | z <sup>2</sup>   | 143 β          | 71                             | xz                             | 0.87      |
|        | 2    | 9884                       | 139 β      | 64             | yz               | 143 β          | 71                             | xz                             | 0.61      |
|        |      |                            | 141 β      | 16             | yz               | 143 β          | 71                             | xz                             | 0.26      |
|        | 3    | 10963                      | 138 β      | 45             | xy               | 143 β          | 71                             | xz                             | 0.24      |
|        |      |                            | 142 β      | 14             | xy               | 143 β          | 71                             | xz                             | 0.59      |
|        | 4    | 15942                      | 141 α      | 65             | z <sup>2</sup>   | 144 α          | 49                             | x <sup>2</sup> -y <sup>2</sup> | 0.47      |
|        |      |                            | 140 β      | 76             | z <sup>2</sup>   | 144 β          | 47                             | x <sup>2</sup> -y <sup>2</sup> | 0.39      |
|        | 5    | 17092                      | 143 α      | 6              | xy               | 144 α          | 49                             | x <sup>2</sup> -y <sup>2</sup> | 0.40      |
|        |      |                            | 142 β      | 14.3           | xy               | 144 β          | 47                             | x <sup>2</sup> -y <sup>2</sup> | 0.18      |

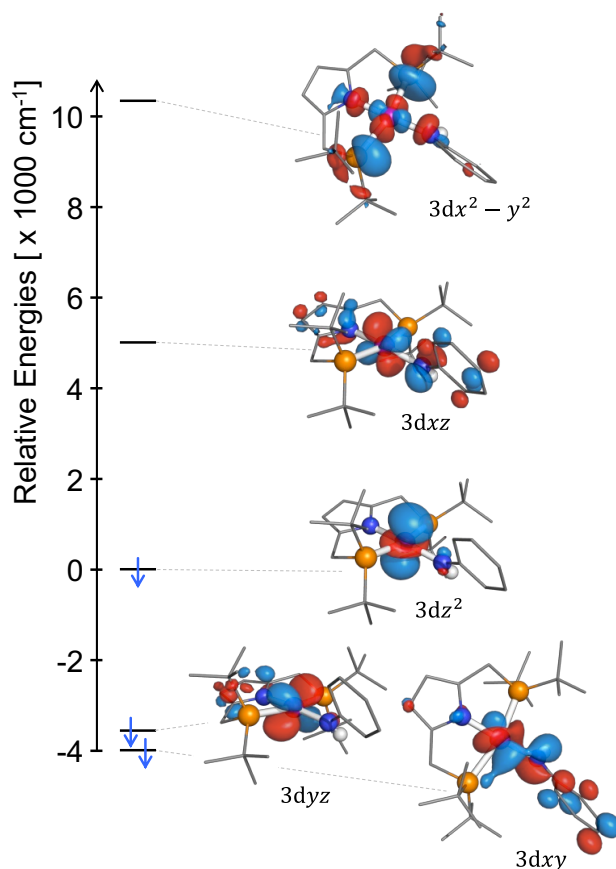

**Figure S14.** Ligand field splitting diagram inferred for **4b** from the analysis of the one electron excitations predicted by TD DFT at the BP86/def2-TZVPP level of theory. Except for H<sub>am</sub> all other hydrogen atoms are omitted.

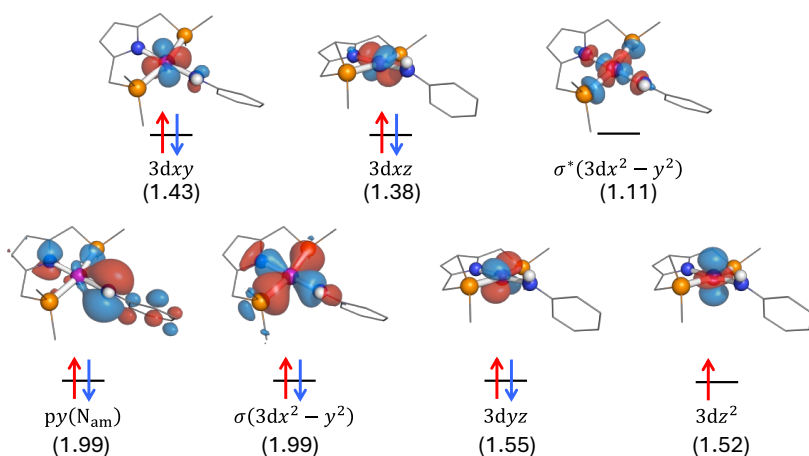

**Figure S15.** The dominant electronic configuration which contributes 92.5% to the ground state predicted by the CAS(7,11) calculations performed for a simplified structural model of **4b**. These calculations considered 25 doublet,  $S = 1/2$  states. The numbers shown in parentheses indicate the predicted Löwdin orbital populations of the corresponding active space orbitals. Except for H<sub>am</sub> all other hydrogen atoms are omitted.

**Table S22.** Theoretical **g** and **A** tensors obtained for the amido complexes.

| Method       | Cmp.            | Principal g values |                          |       | Principal A values [MHz] |                      |     | A <sub>FC</sub> [MHz] | A <sub>orbital</sub> [MHz] |    |    |
|--------------|-----------------|--------------------|--------------------------|-------|--------------------------|----------------------|-----|-----------------------|----------------------------|----|----|
|              |                 |                    |                          |       |                          |                      |     |                       |                            |    |    |
| b3lyp        | 4a              | 2.081              | 2.112                    | 2.323 | 99                       | 347                  | 418 | 165                   | 218                        | 66 | 83 |
|              | 4b              | 2.073              | 2.134                    | 2.365 | 125                      | 361                  | 463 | 182                   | 250                        | 89 | 65 |
| bp86         | 4a              | 2.054              | 2.065                    | 2.194 | -20                      | 296                  | 323 | 129                   | 122                        | 41 | 49 |
|              | 4b              | 2.052              | 2.085                    | 2.222 | 2                        | 294                  | 371 | 141                   | 143                        | 61 | 39 |
| tpssh        | 4a              | 2.059              | 2.078                    | 2.183 | 40                       | 287                  | 359 | 179                   | 119                        | 49 | 49 |
|              | 4b              | 2.052              | 2.092                    | 2.203 | 54                       | 302                  | 416 | 179                   | 134                        | 61 | 39 |
| CAS(7,11)    | 4b <sup>a</sup> | 1.734              | 2.268                    | 3.972 | not available            |                      |     |                       |                            |    |    |
| Experimental |                 | 1.853              | 1.994 (2.2) <sup>b</sup> | 3.288 | 29                       | 5 (210) <sup>b</sup> | 489 | not available         |                            |    |    |

- (a) Simplified structural model derived from the experimental structure of **4b**.  
 (b) Values listed in parentheses were estimated from the peak-to-peak separation of the small ridges found at  $g \sim 2.2$  which appear to originate from a hyperfine splitting not reproduced by our simulations.

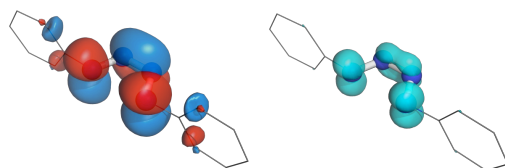

**Figure S16.** SOMO (*left*) and spin density (*right*) of the monoanionic tetrazene ligand. When enforcing a  $C_{2v}$  point group symmetry for the  $[N_4]$  moiety the SOMO has a  $b_1$  symmetry.

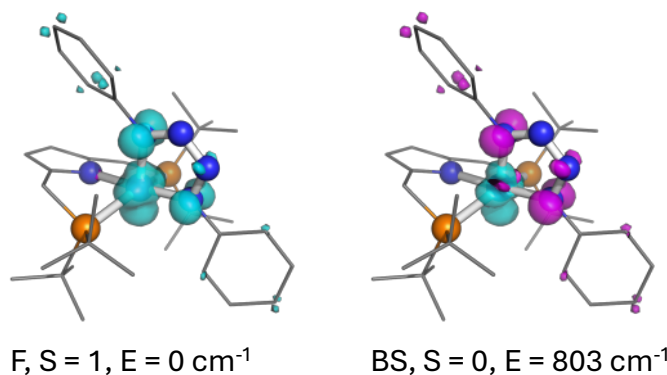

**Figure S17.** Spin densities plots obtained for **3** for the F, S = 1 states (*left*) and the BS, S = 0 (*right*) obtained TPSSH/def2-TZVPP (*left*) level of theory. These plots were obtained using an isosurface value of  $\pm 0.008$ . Spin-up,  $\alpha$  spin density is shown in purple and spin-down,  $\beta$  spin density is shown in cyan.

**Table S23.** Ligand and metal charges, see Scheme S2, inferred from the analysis of the Mulliken atomic charges and spins predicted using DFT for the tetrazido complex **3** using an unabridged structural model derived from experimental X-ray structure.

| Mulliken atomic charges |        |        |        |        |        |        |        |        |        |
|-------------------------|--------|--------|--------|--------|--------|--------|--------|--------|--------|
| Funct.                  | b3lyp  |        |        | bp86   |        |        | tpssh  |        |        |
| S                       | 0      | 1      | 2      | 0      | 1      | 2      | 0      | 1      | 2      |
| Co                      | 0.113  | 0.128  | 0.250  | -0.100 | -0.083 | 0.014  | 0.037  | 0.055  | 0.174  |
| L <sub>PNP</sub>        | 0.140  | 0.155  | 0.046  | 0.287  | 0.294  | 0.252  | 0.164  | 0.170  | 0.070  |
| L <sub>trzn</sub>       | -0.253 | -0.282 | -0.296 | -0.187 | -0.211 | -0.266 | -0.200 | -0.225 | -0.244 |
| P <sub>1</sub>          | 0.212  | 0.213  | 0.199  | 0.186  | 0.192  | 0.187  | 0.045  | 0.046  | 0.033  |
| P <sub>2</sub>          | 0.154  | 0.146  | 0.115  | 0.133  | 0.121  | 0.104  | -0.045 | -0.054 | -0.085 |
| Pyr                     | -0.722 | -0.715 | -0.738 | -0.723 | -0.718 | -0.695 | -0.629 | -0.625 | -0.636 |
| N <sub>PNP</sub>        | -0.091 | -0.087 | -0.139 | -0.007 | -0.005 | -0.038 | -0.084 | -0.082 | -0.134 |
| N <sub>4</sub>          | -0.292 | -0.306 | -0.347 | -0.165 | -0.175 | -0.242 | -0.238 | -0.253 | -0.293 |
| Mulliken atomic spins   |        |        |        |        |        |        |        |        |        |
| Co                      | -0.833 | 1.190  | 2.608  | -0.611 | 1.187  | 2.455  | 0.820  | 1.255  | 2.610  |
| L <sub>PNP</sub>        | 0.099  | 0.076  | 0.435  | 0.053  | 0.125  | 0.636  | -0.121 | 0.039  | 0.426  |
| L <sub>trzn</sub>       | 0.734  | 0.734  | 0.957  | 0.558  | 0.688  | 0.909  | -0.699 | 0.706  | 0.965  |
| P <sub>1</sub>          | 0.033  | 0.024  | 0.108  | 0.044  | 0.035  | 0.143  | -0.043 | 0.010  | 0.102  |
| P <sub>2</sub>          | 0.051  | 0.052  | 0.122  | 0.021  | 0.070  | 0.170  | -0.059 | 0.045  | 0.118  |
| Pyr                     | 0.006  | -0.015 | 0.167  | -0.016 | 0.004  | 0.296  | -0.010 | -0.020 | 0.192  |
| N <sub>PNP</sub>        | 0.016  | -0.024 | 0.094  | 0.008  | -0.020 | 0.142  | -0.021 | -0.031 | 0.096  |
| N <sub>4</sub>          | 0.563  | 0.548  | 0.743  | 0.395  | 0.481  | 0.664  | -0.529 | 0.516  | 0.738  |

**Table S24.** Ligand and metal charges, see Scheme S2, inferred from the analysis of the Löwdin atomic charges and spins predicted using DFT for the tetrazido complex **3** using an unabridged structural model derived from experimental X-ray structure.

| Löwdin atomic charges |        |        |        |        |        |        |        |        |        |
|-----------------------|--------|--------|--------|--------|--------|--------|--------|--------|--------|
| Funct.                | b3lyp  |        |        | bp86   |        |        | tpssh  |        |        |
| S                     | 0      | 1      | 2      | 0      | 1      | 2      | 0      | 1      | 2      |
| Co                    | -0.679 | -0.661 | -0.527 | -0.729 | -0.712 | -0.603 | -0.690 | -0.675 | -0.549 |
| L <sub>PNP</sub>      | 0.834  | 0.852  | 0.736  | 0.896  | 0.906  | 0.835  | 0.857  | 0.868  | 0.759  |
| L <sub>trzn</sub>     | -0.155 | -0.191 | -0.209 | -0.167 | -0.194 | -0.232 | -0.168 | -0.193 | -0.211 |
| P <sub>1</sub>        | 1.011  | 1.014  | 0.984  | 0.998  | 1.002  | 0.972  | 1.004  | 1.007  | 0.977  |
| P <sub>2</sub>        | 1.009  | 1.008  | 0.977  | 1.001  | 0.998  | 0.967  | 1.002  | 1.001  | 0.970  |
| Pyr                   | -0.158 | -0.155 | -0.163 | -0.130 | -0.129 | -0.087 | -0.143 | -0.142 | -0.140 |
| N <sub>PNP</sub>      | 0.225  | 0.225  | 0.199  | 0.250  | 0.250  | 0.239  | 0.232  | 0.232  | 0.209  |
| N <sub>4</sub>        | 0.178  | 0.160  | 0.136  | 0.203  | 0.191  | 0.157  | 0.176  | 0.163  | 0.141  |
| Löwdin atomic charges |        |        |        |        |        |        |        |        |        |
| Co                    | -0.753 | 1.182  | 2.610  | -0.512 | 1.144  | 2.427  | 0.687  | 1.207  | 2.578  |
| L <sub>PNP</sub>      | 0.032  | 0.095  | 0.450  | -0.037 | 0.173  | 0.648  | -0.020 | 0.100  | 0.485  |
| L <sub>trzn</sub>     | 0.721  | 0.723  | 0.940  | 0.550  | 0.683  | 0.925  | -0.667 | 0.693  | 0.937  |
| P <sub>1</sub>        | 0.008  | 0.025  | 0.084  | 0.004  | 0.041  | 0.105  | -0.006 | 0.026  | 0.088  |
| P <sub>2</sub>        | 0.023  | 0.042  | 0.103  | -0.002 | 0.059  | 0.128  | -0.021 | 0.043  | 0.109  |
| Pyr                   | -0.001 | -0.010 | 0.168  | -0.027 | 0.016  | 0.286  | 0.005  | -0.009 | 0.190  |
| N <sub>PNP</sub>      | 0.005  | -0.014 | 0.097  | -0.010 | -0.001 | 0.142  | -0.002 | -0.014 | 0.104  |
| N <sub>4</sub>        | 0.510  | 0.502  | 0.688  | 0.359  | 0.447  | 0.642  | -0.461 | 0.469  | 0.674  |

**Table S25.** Ligand and metal charges, see Scheme S2, inferred from the analysis of the natural atomic charges and spins predicted using DFT for the tetrazido complex **3** using an unabridged structural model derived from experimental X-ray structure.

| Natural atomic charges |        |        |        |        |        |        |        |        |        |
|------------------------|--------|--------|--------|--------|--------|--------|--------|--------|--------|
| Funct.                 | b3lyp  |        |        | bp86   |        |        | tpssh  |        |        |
| S                      | 0      | 1      | 2      | 0      | 1      | 2      | 0      | 1      | 2      |
| Co                     | 0.753  | 0.778  | 1.146  | 0.592  | 0.624  | 0.947  | 0.722  | 0.747  | 1.109  |
| L <sub>PNP</sub>       | -0.043 | -0.026 | -0.287 | 0.095  | 0.097  | -0.090 | -0.004 | 0.004  | -0.251 |
| L <sub>trzn</sub>      | -0.710 | -0.753 | -0.859 | -0.687 | -0.721 | -0.856 | -0.718 | -0.751 | -0.857 |
| P <sub>1</sub>         | 0.939  | 0.951  | 0.865  | 0.955  | 0.969  | 0.883  | 0.931  | 0.940  | 0.849  |
| P <sub>2</sub>         | 0.971  | 0.964  | 0.869  | 1.007  | 0.988  | 0.891  | 0.962  | 0.954  | 0.854  |
| Pyr                    | -0.951 | -0.948 | -1.012 | -0.920 | -0.922 | -0.905 | -0.938 | -0.938 | -0.987 |
| N <sub>PNP</sub>       | -0.561 | -0.561 | -0.660 | -0.507 | -0.510 | -0.569 | -0.547 | -0.548 | -0.640 |
| N <sub>4</sub>         | -0.934 | -0.961 | -1.074 | -0.870 | -0.888 | -1.022 | -0.929 | -0.950 | -1.062 |
| Natural atomic charges |        |        |        |        |        |        |        |        |        |
| Co                     | -0.733 | 1.070  | 2.358  | -0.470 | 1.011  | 2.129  | 0.662  | 1.090  | 2.313  |
| L <sub>PNP</sub>       | 0.027  | 0.140  | 0.583  | -0.048 | 0.227  | 0.810  | -0.015 | 0.147  | 0.625  |
| L <sub>trzn</sub>      | 0.707  | 0.790  | 1.059  | 0.519  | 0.762  | 1.061  | -0.647 | 0.763  | 1.062  |
| P <sub>1</sub>         | 0.005  | 0.052  | 0.150  | 0.007  | 0.075  | 0.182  | -0.004 | 0.055  | 0.158  |
| P <sub>2</sub>         | 0.020  | 0.077  | 0.163  | -0.020 | 0.103  | 0.203  | -0.018 | 0.081  | 0.173  |
| Pyr                    | 0.005  | -0.015 | 0.214  | -0.020 | 0.011  | 0.352  | -0.001 | -0.014 | 0.241  |
| N <sub>PNP</sub>       | 0.011  | -0.021 | 0.153  | -0.005 | -0.006 | 0.218  | -0.008 | -0.020 | 0.164  |
| N <sub>4</sub>         | 0.538  | 0.623  | 0.869  | 0.353  | 0.572  | 0.836  | -0.479 | 0.591  | 0.861  |

**Table S26.** DFT-predicted reduced Mulliken orbital charges and spins for the cobalt ion the tetrazido complex **3** using an unabridged structural model derived from the experimental X-ray structure.

| Mulliken reduced orbital charges            |        |       |       |        |       |       |        |       |       |
|---------------------------------------------|--------|-------|-------|--------|-------|-------|--------|-------|-------|
| Funct.                                      | b3lyp  |       |       | bp86   |       |       | tpssh  |       |       |
| S                                           | 0      | 1     | 2     | 0      | 1     | 2     | 0      | 1     | 2     |
| d <sub>z</sub> <sup>2</sup>                 | 1.024  | 1.045 | 1.211 | 1.151  | 1.153 | 1.277 | 1.057  | 1.070 | 1.230 |
| d <sub>xz</sub>                             | 1.973  | 1.979 | 1.496 | 1.953  | 1.960 | 1.387 | 1.986  | 1.993 | 1.546 |
| d <sub>yz</sub>                             | 1.839  | 1.793 | 1.664 | 1.755  | 1.732 | 1.724 | 1.808  | 1.786 | 1.653 |
| d <sub>x</sub> <sup>2</sup> -y <sup>2</sup> | 0.910  | 0.934 | 1.409 | 1.054  | 1.068 | 1.456 | 0.940  | 0.958 | 1.396 |
| d <sub>xy</sub>                             | 1.891  | 1.860 | 1.626 | 1.836  | 1.813 | 1.713 | 1.890  | 1.853 | 1.632 |
| Mulliken reduced orbital spins              |        |       |       |        |       |       |        |       |       |
| d <sub>z</sub> <sup>2</sup>                 | -0.693 | 0.690 | 0.735 | -0.572 | 0.592 | 0.656 | 0.667  | 0.677 | 0.717 |
| d <sub>xz</sub>                             | -0.011 | 0.010 | 0.505 | -0.019 | 0.018 | 0.605 | 0.014  | 0.012 | 0.471 |
| d <sub>yz</sub>                             | 0.090  | 0.163 | 0.313 | 0.157  | 0.206 | 0.241 | -0.123 | 0.175 | 0.333 |
| d <sub>x</sub> <sup>2</sup> -y <sup>2</sup> | -0.179 | 0.188 | 0.640 | -0.140 | 0.165 | 0.581 | 0.180  | 0.199 | 0.631 |
| d <sub>xy</sub>                             | 0.050  | 0.098 | 0.349 | 0.076  | 0.122 | 0.243 | -0.058 | 0.114 | 0.352 |

**Table S27.** DFT-predicted reduced Löwdin orbital charges and spins for the cobalt ion the tetrazido complex **3** using an unabridged structural model derived from the experimental X-ray structure.

| Löwdin reduced orbital charges              |        |       |       |        |       |       |        |       |       |
|---------------------------------------------|--------|-------|-------|--------|-------|-------|--------|-------|-------|
| Funct.                                      | b3lyp  |       |       | bp86   |       |       | tpssh  |       |       |
| S                                           | 0      | 1     | 2     | 0      | 1     | 2     | 0      | 1     | 2     |
| d <sub>z</sub> <sup>2</sup>                 | 1.222  | 1.243 | 1.409 | 1.325  | 1.328 | 1.449 | 1.243  | 1.256 | 1.418 |
| d <sub>xz</sub>                             | 2.018  | 2.024 | 1.553 | 1.988  | 1.994 | 1.438 | 2.011  | 2.018 | 1.582 |
| d <sub>yz</sub>                             | 1.942  | 1.899 | 1.772 | 1.854  | 1.833 | 1.825 | 1.900  | 1.880 | 1.748 |
| d <sub>x</sub> <sup>2</sup> -y <sup>2</sup> | 1.175  | 1.200 | 1.696 | 1.297  | 1.311 | 1.717 | 1.217  | 1.236 | 1.702 |
| d <sub>xy</sub>                             | 1.965  | 1.937 | 1.705 | 1.899  | 1.879 | 1.780 | 1.946  | 1.911 | 1.693 |
| Löwdin reduced orbital spins                |        |       |       |        |       |       |        |       |       |
| d <sub>z</sub> <sup>2</sup>                 | -0.663 | 0.662 | 0.713 | -0.540 | 0.562 | 0.635 | 0.633  | 0.645 | 0.692 |
| d <sub>xz</sub>                             | -0.011 | 0.011 | 0.502 | -0.015 | 0.017 | 0.602 | 0.011  | 0.011 | 0.467 |
| d <sub>yz</sub>                             | 0.105  | 0.172 | 0.327 | 0.170  | 0.210 | 0.249 | -0.140 | 0.182 | 0.345 |
| d <sub>x</sub> <sup>2</sup> -y <sup>2</sup> | -0.160 | 0.170 | 0.655 | -0.121 | 0.145 | 0.596 | 0.158  | 0.173 | 0.641 |
| d <sub>xy</sub>                             | 0.055  | 0.105 | 0.357 | 0.080  | 0.127 | 0.251 | -0.063 | 0.121 | 0.361 |

**Table S28.** DFT-predicted natural atomic orbital occupancies obtained for the cobalt site of the tetrazido complex **3** obtained for an unbridged structural model derived from the experimental X-ray structure.

| Funct. | S | Sp. | 3dxy  | 3dxz  | 3dyz  | 3dx <sup>2</sup> -y <sup>2</sup> | 3dz <sup>2</sup> | total |
|--------|---|-----|-------|-------|-------|----------------------------------|------------------|-------|
| b3lyp  | 0 | α   | 0.980 | 0.973 | 0.982 | 0.432                            | 0.218            | 3.585 |
|        |   | β   | 0.936 | 0.981 | 0.905 | 0.596                            | 0.888            | 4.305 |
|        |   | α+β | 1.916 | 1.954 | 1.887 | 1.028                            | 1.105            | 7.890 |
|        | 1 | α   | 0.984 | 0.982 | 0.988 | 0.614                            | 0.894            | 4.462 |
|        |   | β   | 0.901 | 0.977 | 0.853 | 0.440                            | 0.229            | 3.399 |
|        |   | α+β | 1.884 | 1.959 | 1.841 | 1.054                            | 1.124            | 7.861 |
|        | 2 | α   | 0.984 | 0.981 | 0.987 | 0.976                            | 0.983            | 4.910 |
|        |   | β   | 0.654 | 0.494 | 0.703 | 0.426                            | 0.281            | 2.558 |
|        |   | α+β | 1.637 | 1.475 | 1.691 | 1.402                            | 1.264            | 7.468 |
| bp86   | 0 | α   | 0.968 | 0.963 | 0.979 | 0.536                            | 0.346            | 3.792 |
|        |   | β   | 0.897 | 0.974 | 0.836 | 0.653                            | 0.890            | 4.251 |
|        |   | α+β | 1.866 | 1.937 | 1.815 | 1.188                            | 1.236            | 8.043 |
|        | 1 | α   | 0.975 | 0.976 | 0.982 | 0.672                            | 0.899            | 4.504 |
|        |   | β   | 0.867 | 0.966 | 0.808 | 0.529                            | 0.335            | 3.505 |
|        |   | α+β | 1.842 | 1.942 | 1.790 | 1.201                            | 1.235            | 8.009 |
|        | 2 | α   | 0.978 | 0.978 | 0.985 | 0.968                            | 0.977            | 4.886 |
|        |   | β   | 0.753 | 0.398 | 0.779 | 0.490                            | 0.354            | 2.774 |
|        |   | α+β | 1.731 | 1.376 | 1.765 | 1.458                            | 1.331            | 7.660 |
| tpssh  | 0 | α   | 0.924 | 0.979 | 0.870 | 0.621                            | 0.888            | 4.281 |
|        |   | β   | 0.976 | 0.970 | 0.980 | 0.460                            | 0.247            | 3.634 |
|        |   | α+β | 1.900 | 1.949 | 1.850 | 1.081                            | 1.135            | 7.915 |
|        | 1 | α   | 0.981 | 0.980 | 0.986 | 0.639                            | 0.898            | 4.483 |
|        |   | β   | 0.881 | 0.975 | 0.840 | 0.461                            | 0.248            | 3.406 |
|        |   | α+β | 1.862 | 1.955 | 1.826 | 1.100                            | 1.145            | 7.889 |
|        | 2 | α   | 0.982 | 0.979 | 0.986 | 0.973                            | 0.981            | 4.902 |
|        |   | β   | 0.647 | 0.528 | 0.685 | 0.441                            | 0.299            | 2.600 |
|        |   | α+β | 1.629 | 1.508 | 1.671 | 1.414                            | 1.280            | 7.502 |

**Table S29.** DFT-predicted natural atomic orbital occupancies obtained for the cobalt site of the tetrazido complex **3** obtained for an unbridged structural model derived from the experimental X-ray structure.

| Funct. | S | 3dxy   | 3dxz   | 3dyz   | 3dx <sup>2</sup> -y <sup>2</sup> | 3dz <sup>2</sup> | total  |
|--------|---|--------|--------|--------|----------------------------------|------------------|--------|
| b3lyp  | 0 | 0.044  | -0.008 | 0.077  | -0.164                           | -0.670           | -0.721 |
|        | 1 | 0.083  | 0.006  | 0.134  | 0.175                            | 0.665            | 1.062  |
|        | 2 | 0.330  | 0.487  | 0.284  | 0.550                            | 0.702            | 2.352  |
| bp86   | 0 | 0.071  | -0.012 | 0.143  | -0.117                           | -0.544           | -0.458 |
|        | 1 | 0.108  | 0.010  | 0.175  | 0.143                            | 0.564            | 1.000  |
|        | 2 | 0.225  | 0.580  | 0.206  | 0.478                            | 0.624            | 2.112  |
| tpssh  | 0 | -0.053 | 0.008  | -0.109 | 0.161                            | 0.640            | 0.647  |
|        | 1 | 0.100  | 0.005  | 0.145  | 0.177                            | 0.650            | 1.078  |
|        | 2 | 0.335  | 0.451  | 0.302  | 0.532                            | 0.682            | 2.301  |

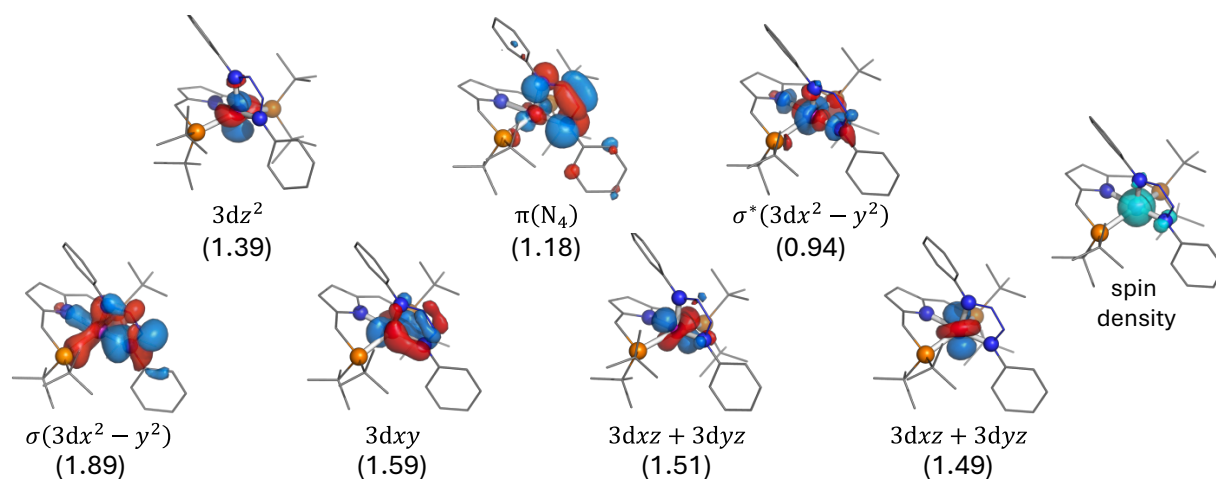

**Figure S18.** Active space orbitals and predicted spin density (*right*) obtained for the CAS(7,10) calculation of the tetrazene complex **3** which considered 10  $S = 1$ , 25  $S = 0$  and 10  $S = 2$  states. The numbers shown in parentheses indicate the predicted Löwdin orbital populations of the corresponding active space orbitals. The major configurations contributing to the ground state are listed in Table S27.

**Table 30.** The twenty most important contributions to the triplet ground state of **3** predicted by various CAS(7,10) calculations using an unbridged structural model derived from the experimental structure. The orbitals spanning the active space are presented in Figure S18.

| #  | 10 $S = 1$ |               | 10 $S = 1$ ,<br>25 $S = 0$ |               | 10 $S = 1$ ,<br>10 $S = 2$ |               | 10 $S = 1$ ,<br>25 $S = 0$ ,<br>10 $S = 2$ |               |
|----|------------|---------------|----------------------------|---------------|----------------------------|---------------|--------------------------------------------|---------------|
|    | <i>c</i>   | <i>config</i> | <i>c</i>                   | <i>config</i> | <i>c</i>                   | <i>config</i> | <i>c</i>                                   | <i>config</i> |
| 1  | 0.217      | 2222101       | 0.235                      | 2222101       | 0.160                      | 2122111       | 0.201                                      | 2122111       |
| 2  | 0.170      | 2222110       | 0.190                      | 2122111       | 0.151                      | 2222101       | 0.198                                      | 2222101       |
| 3  | 0.150      | 2122111       | 0.142                      | 2222110       | 0.129                      | 2121211       | 0.110                                      | 2222110       |
| 4  | 0.112      | 2212201       | 0.087                      | 2212201       | 0.104                      | 2221201       | 0.064                                      | 2121211       |
| 5  | 0.088      | 2112211       | 0.082                      | 2112211       | 0.096                      | 2222110       | 0.057                                      | 2221201       |
| 6  | 0.042      | 2022121       | 0.038                      | 2022121       | 0.041                      | 2112211       | 0.055                                      | 2112211       |
| 7  | 0.027      | 2212210       | 0.030                      | 2212111       | 0.040                      | 2022121       | 0.050                                      | 2212111       |
| 8  | 0.025      | 2121121       | 0.026                      | 2121121       | 0.032                      | 2221111       | 0.040                                      | 2022121       |
| 9  | 0.021      | 2212111       | 0.022                      | 2221111       | 0.032                      | 2221210       | 0.037                                      | 2212201       |
| 10 | 0.021      | 2012221       | 0.014                      | 2212210       | 0.031                      | 2212201       | 0.019                                      | 2112121       |
| 11 | 0.014      | 2221111       | 0.014                      | 2012221       | 0.027                      | 2021221       | 0.013                                      | 2221210       |
| 12 | 0.013      | 2111221       | 0.012                      | 2211211       | 0.014                      | 2122120       | 0.013                                      | 2122120       |
| 13 | 0.012      | 1122121       | 0.010                      | 2111221       | 0.014                      | 2212111       | 0.011                                      | 2021221       |
| 14 | 0.009      | 1222102       | 0.009                      | 1222102       | 0.013                      | 2121220       | 0.010                                      | 2221111       |
| 15 | 0.007      | 2211211       | 0.008                      | 1122121       | 0.008                      | 2012221       | 0.009                                      | 2012221       |
| 16 | 0.005      | 2112220       | 0.006                      | 2122120       | 0.007                      | 2122102       | 0.009                                      | 2211211       |
| 17 | 0.005      | 1022122       | 0.006                      | 1122112       | 0.006                      | 2112121       | 0.007                                      | 2122201       |
| 18 | 0.005      | 1122112       | 0.005                      | 2211112       | 0.006                      | 2212210       | 0.007                                      | 1222102       |
| 19 | 0.004      | 2122120       | 0.005                      | 2122201       | 0.006                      | 1122112       | 0.006                                      | 1122112       |
| 20 | 0.004      | 2211112       | 0.005                      | 2112121       | 0.005                      | 2122201       | 0.006                                      | 2212210       |

**Table S31.** CAS(7,10) charge and spin distributions predicted for **3**.

| Nr St.            | 10 S = 1 |        | 10 S = 1,<br>25 S = 0 |        | 10 S = 1,<br>10 S = 2 |       | 10 S = 1,<br>25 S = 0,<br>10 S = 2 |       |
|-------------------|----------|--------|-----------------------|--------|-----------------------|-------|------------------------------------|-------|
|                   | charge   | spin   | charge                | spin   | charge                | spin  | charge                             | spin  |
| Co                | -0.424   | 2.002  | -0.426                | 0.994  | -0.394                | 2.473 | -0.405                             | 1.643 |
| L <sub>PNP</sub>  | 0.678    | 0.043  | 0.665                 | 0.025  | 0.629                 | 0.107 | 0.637                              | 0.073 |
| L <sub>trzn</sub> | -0.254   | -0.045 | -0.239                | -0.018 | -0.235                | 0.420 | -0.232                             | 0.283 |
| P <sub>1</sub>    | 1.017    | 0.010  | 1.015                 | 0.006  | 1.008                 | 0.026 | 1.010                              | 0.018 |
| P <sub>2</sub>    | 1.005    | 0.009  | 1.002                 | 0.005  | 0.995                 | 0.027 | 0.997                              | 0.018 |
| Py <sub>r</sub>   | -0.242   | 0.018  | -0.244                | 0.010  | -0.253                | 0.034 | -0.251                             | 0.023 |
| N <sub>PNP</sub>  | 0.141    | 0.012  | 0.140                 | 0.007  | 0.133                 | 0.023 | 0.135                              | 0.016 |
| N <sub>4</sub>    | 0.075    | -0.039 | 0.084                 | -0.016 | 0.083                 | 0.338 | 0.086                              | 0.228 |

**Table S32.** Zero field splitting parameters and g tensors derived from the CAS(7,10) calculations of **3**. Values obtained using the effective Hamiltonian approach implemented in ORCA.

| CAS(7,10)                    | D<br>[cm <sup>-1</sup> ] | E/D   | principal g-tensor<br>components |       |       |
|------------------------------|--------------------------|-------|----------------------------------|-------|-------|
| 10 S = 1                     | -87.54                   | 0.122 | 1.984                            | 2.197 | 2.979 |
| 10 S = 1, 25 S = 00          | -165.23                  | 0.037 | 1.715                            | 2.253 | 4.802 |
| 10 S = 1, 10 S = 2           | -179.31                  | 0.025 | 1.701                            | 2.161 | 5.118 |
| 10 S = 1, 25 S = 0, 10 S = 2 | -88.54                   | 0.116 | 1.983                            | 2.203 | 2.998 |

## S5. Reference

- (1) Becke, A. D. Density-Functional Exchange-Energy Approximation with Correct Asymptotic Behavior. *Phys. Rev. A* **1988**, 38 (6), 3098–3100. <https://doi.org/10.1103/PhysRevA.38.3098>.
- (2) Lee, C.; Yang, W.; Parr, R. G. Development of the Colle-Salvetti Correlation-Energy Formula into a Functional of the Electron Density. *Phys. Rev. B* **1988**, 37 (2), 785–789. <https://doi.org/10.1103/PhysRevB.37.785>.
- (3) Perdew, J. P.; Kurth, S.; Zupan, A.; Blaha, P. Accurate Density Functional with Correct Formal Properties: A Step Beyond the Generalized Gradient Approximation. *Phys. Rev. Lett.* **1999**, 82 (12), 2544–2547. <https://doi.org/10.1103/PhysRevLett.82.2544>.
- (4) Barrach, S. M. Population Analysis and Electron Densities from Quantum Mechanics. In *Reviews In computational chemistry*; Reviews In computational chemistry; VCH Publishers, Inc: New York, 1994; Vol. 5, pp 171–227.
- (5) Glendening, E. D.; Badenhop, J. K.; Reed, A. E.; Carpenter, J. E.; Bohmann, J. A.; Morales, C. M.; Karafiloglou, P.; Landis, C. R.; Weinhold, F. NBO 7.0, 2018.
- (6) Duboc, C.; Ganyushin, D.; Sivalingam, K.; Collomb, M.-N.; Neese, F. Systematic Theoretical Study of the Zero-Field Splitting in Coordination Complexes of Mn(III). Density Functional Theory versus Multireference Wave Function Approaches. *The Journal of Physical Chemistry A* **2010**, 114 (39), 10750–10758. <https://doi.org/10.1021/jp107823s>.
- (7) Duboc, C. Determination and Prediction of the Magnetic Anisotropy of Mn Ions. *Chemical Society Reviews* **2016**, 45 (21), 5834–5847. <https://doi.org/10.1039/C5CS00898K>.
